# Supplementary material for: Widespread association of the Argonaute protein AGO2 with meiotic chromatin suggests a distinct nuclear function in mammalian male reproduction
Source: HighWire-hosted journal article supplement (doi:10.1101/gr.276578.122), 2022-09-01
Supplement: Supplemental_Table_S3.xlsx [file Supplemental_Table_S3.xlsx]

## Sheet: ChIP alignments
Dataset	ChIP total reads	ChIP aligned reads	input total reads	input aligned reads
mESC (Millipore 04-642)	65591764	63534357	47859203	47105016
mESC (Abcam ab32381)	60580695	58026435	43022838	42514582
mESC nuclei	134051812	94278639	135285004	131929936
mESC nuclei + RNAse	122004572	89124339	125161228	125161228
Spermatogonia replicate 1	29240704	19184664	31319121	29517414
Spermatogonia replicate 2	164561776	25737311	95646784	10455497
Pachytene spermatocytes replicate 1	122795810	112837070	105092748	103022421
Pachytene spermatocytes replicate 2	135794876	100882013	82246960	80445751
Round spermatids replicate 1	15006783	5344030	29400102	27915290
Round spermatids replicate 2	156201921	23122918	204072448	48369654
Ago2 cKO (mixed pachytene/round spermatids)	100065144	6496259	132618116	11022934
control (mixed pachytene/round spermatids)	101754412	25203247	94831644	44707741

## Sheet: ChIP peaks, pre-meiotic
chromosome	start	end
chr1	12644767	12644853
chr1	44951214	44951299
chr1	134560350	134560462
chr1	134613267	134613362
chr10	37263710	37263800
chr11	25100083	25100195
chr11	69399940	69400325
chr11	69400702	69400849
chr11	69400986	69401382
chr11	69401514	69401669
chr11	69401758	69401837
chr11	69401915	69401988
chr11	69402070	69402281
chr11	69403573	69403687
chr11	69403795	69403919
chr11	69404004	69404371
chr11	104528271	104528356
chr11	109011671	109012083
chr12	3109909	3110079
chr12	78350945	78351023
chr12	120028706	120028973
chr13	3373084	3373185
chr13	112578208	112578291
chr13	119599040	119599120
chr13	120321490	120321589
chr14	19415743	19415912
chr14	19416146	19416271
chr14	19416929	19417045
chr14	19417248	19417369
chr14	19417474	19417617
chr14	19417811	19417921
chr14	19418157	19418265
chr14	19418581	19418654
chr14	19418741	19418887
chr14	19419331	19419441
chr14	86199021	86199094
chr14	104336944	104337051
chr14	107075296	107075378
chr14	124801584	124801705
chr15	47540006	47540091
chr15	75086678	75086843
chr16	11144223	11144299
chr16	57391466	57391654
chr16	98107548	98107711
chr17	4626170	4626585
chr17	39846470	39847206
chr17	39847468	39848058
chr17	56200002	56200085
chr2	20900060	20900140
chr2	60402760	60402836
chr2	98662268	98662458
chr2	98662542	98662788
chr2	98662867	98662945
chr2	98663835	98663971
chr2	98665083	98665178
chr2	98666589	98666993
chr2	98667077	98667291
chr2	182013016	182013159
chr3	5860367	5860527
chr3	5860618	5860788
chr3	159939442	159939632
chr5	146261149	146261313
chr6	3200877	3201111
chr6	10186381	10186464
chr6	47540706	47540832
chr6	47541871	47541952
chr6	47544472	47544555
chr6	47545712	47545880
chr6	47547351	47547424
chr6	47551747	47551879
chr6	47554150	47554246
chr6	47556032	47556128
chr6	47576546	47576659
chr6	47577575	47577649
chr6	49236501	49236574
chr6	103649176	103649249
chr6	125876914	125877156
chr6	132463712	132463803
chr7	98060017	98060104
chr7	145340959	145341226
chr8	66312634	66312710
chr9	3000311	3000603
chr9	3001304	3001483
chr9	3002066	3002295
chr9	3002970	3003071
chr9	3003363	3003540
chr9	3003620	3003699
chr9	3004070	3004262
chr9	3004571	3004830
chr9	3006388	3006500
chr9	3006705	3006861
chr9	3007126	3007291
chr9	3008020	3008095
chr9	3008477	3008591
chr9	3009307	3009481
chr9	3009736	3009856
chr9	3010846	3011009
chr9	3012255	3012441
chr9	3012760	3012925
chr9	3013185	3013313
chr9	3014031	3014340
chr9	3014815	3014907
chr9	3015299	3015448
chr9	3015706	3015780
chr9	3015967	3016080
chr9	3016486	3016656
chr9	3016992	3017212
chr9	3017864	3018089
chr9	3018472	3018678
chr9	3019885	3020046
chr9	3020185	3020275
chr9	3020471	3020577
chr9	3020856	3021115
chr9	3021599	3021684
chr9	3022014	3022234
chr9	3022480	3022596
chr9	3023465	3023709
chr9	3024088	3024188
chr9	3024403	3024631
chr9	3025017	3025126
chr9	3025503	3025588
chr9	3025693	3025831
chr9	3027131	3027245
chr9	3027560	3027673
chr9	3027775	3027879
chr9	3028086	3028201
chr9	3028536	3028649
chr9	3029690	3029834
chr9	3030595	3030722
chr9	3031244	3031345
chr9	3031696	3031805
chr9	3032027	3032208
chr9	3032366	3032509
chr9	3032595	3032714
chr9	3033724	3033879
chr9	3034399	3034522
chr9	3034880	3035238
chr9	3037197	3037270
chr9	3038115	3038232
chr9	3258838	3258917
chr9	19575434	19575511
chr9	35305249	35305553
chr9	56223646	56223719
chr9	56223838	56223925
chr9	62608591	62608668
chr9	78480954	78481028
chr9	110281269	110281357
chr9	123461939	123462162
chrX	112370881	112370964
chrX	122831387	122831460
chrX	170758282	170758363

## Sheet: ChIP peaks, meiotic
chromosome	start	end
chr1	3136634	3137162
chr1	3502043	3502313
chr1	4083638	4084413
chr1	4557382	4557756
chr1	4561112	4561830
chr1	4562179	4563697
chr1	4565084	4565844
chr1	5351608	5351991
chr1	5353133	5354314
chr1	5354896	5355946
chr1	5627686	5628059
chr1	5821465	5821735
chr1	5822918	5823417
chr1	5823629	5823997
chr1	6169776	6171068
chr1	6432513	6432783
chr1	6433064	6433682
chr1	6433940	6434605
chr1	6436031	6436301
chr1	6563811	6564502
chr1	6636589	6637126
chr1	6948588	6949046
chr1	7190689	7191082
chr1	7193131	7194451
chr1	7195878	7196673
chr1	7330106	7331043
chr1	7332245	7332726
chr1	7333526	7334343
chr1	7790185	7790665
chr1	7840712	7841299
chr1	8000094	8000496
chr1	8157536	8157996
chr1	8159697	8160301
chr1	8217467	8217740
chr1	8600388	8600806
chr1	8658473	8658863
chr1	8662043	8662313
chr1	8694347	8694706
chr1	8700264	8700534
chr1	9049337	9049609
chr1	9050511	9051039
chr1	9121837	9122249
chr1	9242781	9244067
chr1	10730107	10730891
chr1	10730997	10731473
chr1	10735103	10735630
chr1	10890856	10892003
chr1	10892598	10893465
chr1	10894924	10895194
chr1	11259060	11259570
chr1	11260513	11262066
chr1	11615905	11617036
chr1	11618065	11618538
chr1	11778364	11779159
chr1	11779674	11780096
chr1	11781025	11782151
chr1	11889329	11889999
chr1	12550435	12550834
chr1	12665519	12666755
chr1	13209962	13210269
chr1	13549619	13550273
chr1	13552683	13552953
chr1	14115702	14116840
chr1	14118580	14118852
chr1	14478454	14480249
chr1	14480665	14481501
chr1	14970549	14971332
chr1	15022408	15022685
chr1	15023922	15024419
chr1	15025269	15025730
chr1	15036912	15037412
chr1	15086548	15086818
chr1	15259160	15259630
chr1	15261648	15262085
chr1	15492277	15492823
chr1	15494335	15496093
chr1	15738177	15738786
chr1	15739074	15740738
chr1	15741034	15741337
chr1	15742950	15743401
chr1	15950601	15951400
chr1	16030537	16030905
chr1	16164563	16165212
chr1	16622272	16623047
chr1	16623238	16624305
chr1	16624699	16625276
chr1	16894054	16894331
chr1	16894830	16895774
chr1	16896282	16896711
chr1	16897099	16897677
chr1	16913364	16914150
chr1	16951024	16952391
chr1	16952630	16953663
chr1	17293001	17294280
chr1	17329019	17330262
chr1	17388367	17389012
chr1	17470067	17470955
chr1	17703269	17704896
chr1	17899761	17900045
chr1	17917681	17918413
chr1	17919131	17919821
chr1	17943636	17943939
chr1	17960745	17961113
chr1	18449225	18450434
chr1	18542177	18542447
chr1	19126288	19126855
chr1	19373318	19373793
chr1	19374843	19375113
chr1	19402651	19403019
chr1	19435554	19436386
chr1	19438376	19439066
chr1	19623509	19624217
chr1	19626500	19626848
chr1	19688969	19689321
chr1	19690162	19691553
chr1	19799826	19800904
chr1	19997973	19998404
chr1	20262559	20262829
chr1	20278464	20279124
chr1	20281726	20282219
chr1	20282344	20282886
chr1	20315980	20316343
chr1	20318554	20318824
chr1	20435811	20436382
chr1	20488740	20489098
chr1	20489874	20490317
chr1	20490461	20490754
chr1	20491648	20492294
chr1	20577686	20578434
chr1	21117525	21117858
chr1	21197141	21197739
chr1	21200033	21201429
chr1	21581087	21581626
chr1	21998785	21999055
chr1	22153356	22154017
chr1	22158013	22158468
chr1	22160460	22161283
chr1	22235443	22236324
chr1	22918116	22918677
chr1	23296656	23297464
chr1	23299265	23299610
chr1	23303259	23304283
chr1	23885727	23887228
chr1	23888686	23889265
chr1	23890365	23890742
chr1	24078885	24079509
chr1	24497964	24498270
chr1	24499592	24500086
chr1	24501629	24502735
chr1	24614831	24615185
chr1	25121621	25122102
chr1	25521797	25522948
chr1	25523133	25523664
chr1	25524195	25525264
chr1	25525883	25526405
chr1	25591412	25591814
chr1	25592753	25593499
chr1	25595200	25595528
chr1	25662277	25664274
chr1	25665071	25665551
chr1	25668506	25668776
chr1	26259594	26260272
chr1	26349607	26350572
chr1	26350875	26351548
chr1	26417091	26417780
chr1	26418119	26418615
chr1	26431676	26432099
chr1	26801432	26802685
chr1	26802817	26803344
chr1	26836964	26837542
chr1	26939479	26940489
chr1	27143649	27144250
chr1	27144425	27145020
chr1	27163795	27164402
chr1	27164924	27165430
chr1	27755274	27756015
chr1	28187416	28188549
chr1	28188708	28189384
chr1	28289938	28290870
chr1	29370616	29370888
chr1	29373415	29373833
chr1	29582720	29583066
chr1	29606610	29607037
chr1	29607252	29607570
chr1	29643405	29643973
chr1	29645122	29645800
chr1	29646491	29646907
chr1	29944586	29944936
chr1	29945318	29945764
chr1	30036548	30037832
chr1	30040465	30041155
chr1	30066892	30067824
chr1	30068021	30068563
chr1	30069307	30070196
chr1	30070822	30071323
chr1	30161879	30162485
chr1	30304949	30305963
chr1	30371850	30372218
chr1	30660861	30661652
chr1	30661795	30662979
chr1	30663445	30664064
chr1	30664494	30664896
chr1	30665493	30665856
chr1	30731131	30731698
chr1	30736172	30736442
chr1	31078531	31079603
chr1	31079726	31080464
chr1	31218031	31218587
chr1	31295411	31295809
chr1	31586387	31587069
chr1	31694983	31695890
chr1	31698125	31700225
chr1	31815218	31815744
chr1	31818568	31818905
chr1	32065456	32065736
chr1	32069806	32070659
chr1	32071626	32072028
chr1	32081747	32082017
chr1	32162710	32163932
chr1	32374880	32375268
chr1	32486458	32486740
chr1	32668098	32668671
chr1	32780440	32781373
chr1	33014093	33014568
chr1	33047053	33047671
chr1	33049177	33050081
chr1	33051265	33051696
chr1	33115480	33115983
chr1	33116146	33116720
chr1	33169001	33169542
chr1	33408611	33409702
chr1	33411159	33411902
chr1	33412193	33413854
chr1	34081213	34082077
chr1	34082326	34082818
chr1	34347644	34348002
chr1	34348325	34348595
chr1	34420681	34421069
chr1	34644731	34646757
chr1	34647566	34648244
chr1	34648391	34648893
chr1	34650529	34651050
chr1	35154967	35155261
chr1	35157445	35158884
chr1	35409723	35410224
chr1	35411054	35411665
chr1	35413034	35413332
chr1	35413475	35413812
chr1	35789677	35790400
chr1	35790629	35791018
chr1	36032564	36032990
chr1	36033983	36034856
chr1	36951394	36952886
chr1	36953067	36954546
chr1	37776127	37776747
chr1	38299602	38299907
chr1	38707097	38707794
chr1	40199885	40200175
chr1	41331958	41332354
chr1	41680167	41680652
chr1	42014181	42014879
chr1	42138946	42139899
chr1	42141846	42142812
chr1	42335391	42336274
chr1	42337075	42337794
chr1	42338598	42339991
chr1	42340328	42340691
chr1	43850586	43851477
chr1	43853147	43853765
chr1	44271712	44272005
chr1	44281979	44282387
chr1	44293025	44293620
chr1	44372334	44372896
chr1	44373976	44374456
chr1	44385469	44385833
chr1	44416830	44417407
chr1	44478531	44478897
chr1	44481054	44481349
chr1	44482372	44483723
chr1	44484682	44485140
chr1	44489785	44490090
chr1	44603357	44603739
chr1	44697101	44697371
chr1	44722634	44723406
chr1	44726133	44726758
chr1	44906636	44908694
chr1	44908816	44909191
chr1	44964467	44964911
chr1	45166787	45167242
chr1	45170555	45171212
chr1	45202517	45202857
chr1	45203565	45204616
chr1	45631413	45631973
chr1	45736693	45737137
chr1	45737418	45737821
chr1	46093768	46095280
chr1	46350590	46350968
chr1	46385716	46386302
chr1	46444585	46445349
chr1	46445493	46446542
chr1	46448766	46449639
chr1	46489806	46490969
chr1	46566724	46567017
chr1	46585344	46585767
chr1	46586406	46586942
chr1	46587371	46588186
chr1	46588458	46588980
chr1	46701879	46702629
chr1	46954557	46955096
chr1	46991490	46992459
chr1	46994425	46994945
chr1	46995706	46996691
chr1	47081644	47082240
chr1	47082830	47083318
chr1	47085501	47086038
chr1	47086270	47086608
chr1	47106001	47106453
chr1	47109183	47110059
chr1	47210445	47210908
chr1	47246039	47246712
chr1	47588621	47589621
chr1	47629058	47630296
chr1	47630565	47630944
chr1	47631098	47631571
chr1	47633228	47633498
chr1	47633693	47634375
chr1	47956364	47956682
chr1	48091409	48092185
chr1	48226705	48227167
chr1	48227672	48227984
chr1	48264946	48265224
chr1	48285128	48285460
chr1	48285614	48286164
chr1	48418847	48419741
chr1	48420832	48421167
chr1	48421330	48422134
chr1	48423458	48423814
chr1	48547128	48548170
chr1	48548577	48549507
chr1	48549871	48550888
chr1	48922137	48922407
chr1	48923291	48923973
chr1	48924169	48924692
chr1	48925451	48926023
chr1	48926193	48927035
chr1	49583359	49584103
chr1	50332702	50333176
chr1	50335503	50336132
chr1	50876531	50876961
chr1	51177230	51177612
chr1	51255097	51255465
chr1	51255585	51255887
chr1	51435911	51436306
chr1	51714166	51714645
chr1	51716236	51716634
chr1	52236501	52237865
chr1	52401297	52401718
chr1	52406017	52406476
chr1	52591787	52592924
chr1	52891635	52892009
chr1	52892370	52892640
chr1	52893033	52893371
chr1	52939840	52940535
chr1	52941485	52943353
chr1	52944119	52945457
chr1	53131787	53132057
chr1	53493073	53493361
chr1	53519297	53520112
chr1	54028121	54028741
chr1	54266957	54267302
chr1	54268753	54271473
chr1	54390632	54391281
chr1	54392522	54393384
chr1	54890836	54891835
chr1	54892857	54893504
chr1	55366939	55367606
chr1	55465390	55467121
chr1	55476441	55477944
chr1	55615535	55616393
chr1	55776478	55777126
chr1	55780337	55780856
chr1	55783638	55783939
chr1	55924656	55925043
chr1	55926548	55927330
chr1	55928603	55929144
chr1	56092386	56092946
chr1	56095028	56095303
chr1	56097416	56098560
chr1	56137983	56139624
chr1	56142304	56143268
chr1	56382654	56383703
chr1	56384356	56384788
chr1	56385061	56386401
chr1	56716612	56717025
chr1	56775290	56775689
chr1	56776771	56777416
chr1	57065190	57065641
chr1	58087357	58087798
chr1	58324310	58325934
chr1	58326809	58327640
chr1	58813512	58813890
chr1	58815125	58815660
chr1	58939813	58940146
chr1	60320647	60322498
chr1	60323903	60325121
chr1	60691214	60691798
chr1	60727478	60729052
chr1	60730790	60731262
chr1	61213121	61213781
chr1	61365067	61366489
chr1	61515821	61516376
chr1	61518647	61519158
chr1	61520266	61521167
chr1	61673016	61673338
chr1	61673548	61674932
chr1	62100744	62101081
chr1	62102704	62103245
chr1	62296131	62296760
chr1	62298966	62299272
chr1	62301008	62301894
chr1	62457714	62458186
chr1	62534750	62535336
chr1	62536689	62537480
chr1	62540614	62540884
chr1	62671574	62672065
chr1	62672673	62672967
chr1	62673161	62674274
chr1	62674629	62675159
chr1	62675827	62677114
chr1	62867201	62867515
chr1	63832248	63834085
chr1	63835669	63836015
chr1	63861335	63863141
chr1	63863619	63864622
chr1	63887296	63887649
chr1	63887934	63888276
chr1	63888540	63889212
chr1	63890103	63891202
chr1	63892709	63893143
chr1	64181784	64183341
chr1	64184070	64184366
chr1	64314016	64314455
chr1	64383742	64384251
chr1	64385390	64385696
chr1	64386420	64387728
chr1	64583344	64583640
chr1	64962858	64963212
chr1	64964308	64964728
chr1	64964849	64965154
chr1	65414568	65415240
chr1	65416405	65417177
chr1	65470772	65471747
chr1	65751653	65751956
chr1	65753625	65753897
chr1	65977429	65977707
chr1	66020323	66020797
chr1	66049364	66050706
chr1	66274408	66275362
chr1	66518435	66518943
chr1	66543465	66543994
chr1	66546592	66547173
chr1	67279853	67280845
chr1	67588051	67588660
chr1	67754128	67755209
chr1	68128283	68128683
chr1	68128793	68130110
chr1	68269300	68270430
chr1	68408526	68408893
chr1	68583136	68583518
chr1	68583630	68583962
chr1	68599175	68600032
chr1	68626823	68627678
chr1	68630664	68631140
chr1	69193553	69194931
chr1	69231913	69232318
chr1	69232438	69233315
chr1	69233549	69233989
chr1	69236197	69236716
chr1	69456751	69457021
chr1	69699795	69700209
chr1	69700319	69701123
chr1	69940447	69942857
chr1	69964297	69965046
chr1	70209986	70210381
chr1	70211239	70211564
chr1	70211682	70211952
chr1	70214042	70214874
chr1	70238479	70239040
chr1	70457102	70457924
chr1	70547399	70548661
chr1	70632264	70632752
chr1	70688208	70688739
chr1	70690073	70690412
chr1	70875825	70876366
chr1	70981739	70983073
chr1	70984821	70985466
chr1	70986091	70986361
chr1	71081768	71082255
chr1	71082374	71083485
chr1	71084099	71084696
chr1	71251831	71252163
chr1	71451498	71452400
chr1	71532506	71532970
chr1	71533712	71534613
chr1	71535341	71535852
chr1	72542276	72543326
chr1	72545794	72546096
chr1	72546663	72547207
chr1	73318879	73319727
chr1	73552813	73553532
chr1	73647819	73648172
chr1	73652484	73652910
chr1	73870165	73870655
chr1	73871026	73871604
chr1	73891374	73891644
chr1	74655205	74655810
chr1	74655915	74656297
chr1	74657013	74657837
chr1	74657955	74658484
chr1	75708912	75710366
chr1	76354808	76356389
chr1	76460904	76461829
chr1	76462869	76463313
chr1	76463593	76463926
chr1	76464876	76466016
chr1	76615861	76616229
chr1	76773718	76774389
chr1	76774821	76775387
chr1	77478918	77479188
chr1	77479797	77481139
chr1	77481390	77481877
chr1	77483100	77483521
chr1	77786527	77786797
chr1	78241277	78241796
chr1	78242598	78244364
chr1	78246516	78246936
chr1	78573706	78574039
chr1	78949114	78950044
chr1	78950157	78950489
chr1	78951491	78952042
chr1	78952450	78952936
chr1	78988711	78989186
chr1	79124051	79124484
chr1	79381645	79382769
chr1	79383039	79384264
chr1	79385461	79386973
chr1	79653697	79654875
chr1	79889192	79889462
chr1	79941039	79941944
chr1	79942144	79942414
chr1	79964020	79964312
chr1	79964805	79965148
chr1	79965385	79965873
chr1	79966008	79966364
chr1	79966501	79967994
chr1	80125809	80126333
chr1	80127026	80127367
chr1	80135732	80136574
chr1	80986169	80986518
chr1	81421089	81421923
chr1	81424053	81424554
chr1	81500497	81501046
chr1	81502384	81502945
chr1	81566083	81566638
chr1	81567357	81567627
chr1	81568119	81568889
chr1	82399440	82399710
chr1	82399922	82400192
chr1	82424126	82424623
chr1	82425694	82427003
chr1	82551335	82552297
chr1	83017666	83018020
chr1	83458227	83458849
chr1	83461910	83462388
chr1	83512500	83514165
chr1	83516323	83516729
chr1	83616511	83616866
chr1	83821063	83821480
chr1	83822367	83822999
chr1	83983798	83984486
chr1	84123693	84124879
chr1	84126200	84126470
chr1	84126600	84127794
chr1	84164565	84166117
chr1	84266908	84268088
chr1	84546917	84547354
chr1	84572318	84572659
chr1	84572894	84573818
chr1	84574859	84575222
chr1	84702420	84703791
chr1	84705938	84706304
chr1	85053091	85054124
chr1	85225329	85225733
chr1	87136410	87136804
chr1	87460805	87461365
chr1	87461515	87461963
chr1	87462126	87463092
chr1	87463957	87464583
chr1	87731750	87732098
chr1	88830251	88830567
chr1	88831346	88832268
chr1	88832624	88833316
chr1	88834513	88834834
chr1	89199963	89200474
chr1	89218368	89219114
chr1	89222043	89222939
chr1	90990703	90990973
chr1	91471470	91472063
chr1	91475386	91476043
chr1	91476336	91477165
chr1	92567603	92568108
chr1	93839974	93840764
chr1	93841024	93841621
chr1	93844605	93845298
chr1	93959107	93959564
chr1	94105898	94106844
chr1	94142559	94142910
chr1	94152646	94153272
chr1	94153379	94153724
chr1	94155255	94157341
chr1	94198140	94198410
chr1	94388373	94389060
chr1	94389163	94390054
chr1	94393124	94394019
chr1	94401677	94402058
chr1	94402739	94403136
chr1	94476382	94477421
chr1	94725958	94726445
chr1	94726805	94728482
chr1	94728630	94729552
chr1	94853851	94854733
chr1	95227854	95228740
chr1	95228901	95229345
chr1	95233208	95234703
chr1	95235771	95236362
chr1	95513539	95514168
chr1	95517588	95517858
chr1	95636018	95636472
chr1	95696740	95697479
chr1	95809954	95810257
chr1	95813102	95813571
chr1	96192084	96193074
chr1	96194885	96195210
chr1	96576829	96577528
chr1	96718415	96718705
chr1	96827785	96828186
chr1	97174324	97175230
chr1	97417296	97418225
chr1	97419055	97420491
chr1	97867555	97868068
chr1	98115225	98116214
chr1	98205939	98206579
chr1	98368463	98369757
chr1	98370352	98371594
chr1	98386588	98386983
chr1	98387522	98387827
chr1	98390954	98391627
chr1	98618799	98619069
chr1	98643470	98643780
chr1	98887295	98887579
chr1	98897529	98897820
chr1	98947349	98947707
chr1	98950664	98950934
chr1	99184671	99185490
chr1	99345757	99346902
chr1	99347240	99347553
chr1	99348177	99349819
chr1	99579306	99579886
chr1	100640891	100641531
chr1	100757269	100758785
chr1	100944700	100945519
chr1	101042806	101043328
chr1	101148477	101148821
chr1	101247603	101247874
chr1	101304184	101305495
chr1	101306290	101307196
chr1	101307339	101308426
chr1	101331444	101331932
chr1	101363061	101363703
chr1	101601177	101602611
chr1	101602815	101603877
chr1	101604172	101604451
chr1	101760807	101761413
chr1	101761530	101762182
chr1	101929408	101930202
chr1	101933277	101934054
chr1	101980058	101980530
chr1	101983764	101984389
chr1	102002228	102002699
chr1	102086286	102087100
chr1	102090767	102091431
chr1	102253675	102254457
chr1	102600110	102600685
chr1	102602326	102603330
chr1	102603471	102603823
chr1	103206879	103207559
chr1	103207957	103209590
chr1	103404570	103405427
chr1	103414339	103414725
chr1	103594223	103594493
chr1	103920911	103921934
chr1	103923838	103924108
chr1	104218681	104219228
chr1	104221322	104222688
chr1	104222970	104223251
chr1	104274431	104275036
chr1	104277059	104277817
chr1	104278937	104280005
chr1	104292166	104292436
chr1	104962824	104963968
chr1	104965830	104967145
chr1	105013945	105015709
chr1	105017744	105018417
chr1	105018956	105019515
chr1	105019850	105020122
chr1	105569073	105569446
chr1	105607094	105608006
chr1	105614324	105614594
chr1	105835071	105836015
chr1	106295894	106296738
chr1	106297464	106298043
chr1	106298707	106299047
chr1	106849163	106849722
chr1	106851844	106852770
chr1	106854455	106855279
chr1	107122205	107122496
chr1	107204083	107205097
chr1	107205353	107206991
chr1	107207155	107207724
chr1	107628482	107629037
chr1	107631190	107631578
chr1	107752134	107753614
chr1	107825659	107826075
chr1	107827281	107828069
chr1	107882017	107882722
chr1	107885934	107886493
chr1	107887408	107888050
chr1	107888563	107889026
chr1	107925117	107925847
chr1	108353082	108353776
chr1	108353955	108354660
chr1	108355198	108355568
chr1	108355848	108356492
chr1	108356598	108357085
chr1	108406118	108407854
chr1	108409172	108409949
chr1	108411100	108411705
chr1	108411901	108412512
chr1	108413018	108413786
chr1	108414571	108415606
chr1	108518097	108519086
chr1	108521340	108521651
chr1	108522549	108523274
chr1	108734209	108734716
chr1	108735297	108735628
chr1	108846094	108846516
chr1	109035425	109036286
chr1	109038633	109039010
chr1	109128705	109129795
chr1	109130380	109130650
chr1	109130766	109131077
chr1	109615377	109616113
chr1	109616548	109617911
chr1	109618205	109618812
chr1	109619887	109620429
chr1	109872931	109873205
chr1	109874070	109874568
chr1	109875268	109875967
chr1	110940476	110941414
chr1	111257223	111257493
chr1	111259473	111259949
chr1	111577213	111577616
chr1	111580162	111580454
chr1	111708986	111709300
chr1	112168652	112169175
chr1	112174305	112175600
chr1	112214847	112216747
chr1	112218993	112219332
chr1	112555159	112555429
chr1	112566084	112566812
chr1	112817074	112817400
chr1	112818817	112819563
chr1	112840810	112841201
chr1	112933094	112933652
chr1	113017424	113017801
chr1	113018775	113019089
chr1	113019256	113019635
chr1	113020016	113020585
chr1	113021597	113022891
chr1	113053661	113055188
chr1	113055579	113056060
chr1	113341058	113342183
chr1	113696890	113697160
chr1	113739707	113739983
chr1	113746967	113747237
chr1	113897280	113898063
chr1	114031535	114031897
chr1	114032370	114033119
chr1	114034316	114034721
chr1	114105023	114105788
chr1	114176939	114177343
chr1	114181400	114182201
chr1	114188730	114189059
chr1	114190028	114190330
chr1	114225558	114226913
chr1	114227453	114228741
chr1	114229363	114229676
chr1	114271713	114272046
chr1	114557527	114558402
chr1	114558507	114559434
chr1	114559984	114560705
chr1	114604573	114605188
chr1	114764786	114765125
chr1	114768355	114768774
chr1	114769947	114770409
chr1	114803910	114804467
chr1	114804616	114805118
chr1	114985078	114985369
chr1	115101185	115101763
chr1	115451655	115453089
chr1	115457127	115457773
chr1	115458117	115458390
chr1	115479049	115480190
chr1	115799608	115800564
chr1	115885883	115886667
chr1	115887363	115888860
chr1	116357766	116358902
chr1	116359153	116359560
chr1	116360691	116361617
chr1	116362497	116363459
chr1	116534988	116535258
chr1	116588674	116589022
chr1	116652262	116652851
chr1	116653401	116653697
chr1	117168564	117168923
chr1	117258991	117259596
chr1	117259737	117260208
chr1	117295599	117295937
chr1	117370896	117372826
chr1	117428123	117428606
chr1	117481697	117482428
chr1	117482786	117483152
chr1	117484641	117485371
chr1	118096996	118097387
chr1	118123525	118124612
chr1	118125170	118125440
chr1	118147734	118148073
chr1	118582353	118583833
chr1	118587515	118588238
chr1	119745483	119746572
chr1	119747349	119748222
chr1	119749040	119750545
chr1	120573884	120574287
chr1	120997108	120998645
chr1	121037694	121037974
chr1	121041059	121041682
chr1	121161607	121161933
chr1	121203594	121205477
chr1	121205684	121207448
chr1	121207645	121208636
chr1	121209013	121209757
chr1	121624407	121624756
chr1	121665211	121665599
chr1	121738948	121740422
chr1	122089534	122089873
chr1	122091292	122091742
chr1	122091929	122092303
chr1	122771721	122772141
chr1	122955095	122955418
chr1	123515020	123515364
chr1	123858342	123858996
chr1	123860288	123860647
chr1	124199181	124199713
chr1	124200761	124201464
chr1	124561533	124562003
chr1	124966245	124968132
chr1	125133986	125134649
chr1	125136864	125137547
chr1	125137735	125138295
chr1	125138767	125139438
chr1	125139802	125140342
chr1	125193499	125194014
chr1	125321607	125322183
chr1	125359179	125359760
chr1	125511592	125512129
chr1	125617514	125617841
chr1	126428882	126429204
chr1	126663828	126665008
chr1	126669266	126669862
chr1	126769790	126770627
chr1	126771684	126772393
chr1	126793202	126793625
chr1	127558624	127559550
chr1	127560136	127562009
chr1	127876889	127877439
chr1	127878732	127879398
chr1	127879566	127880759
chr1	127893633	127894741
chr1	128484072	128484580
chr1	128484788	128485366
chr1	128501465	128501817
chr1	128502143	128502618
chr1	128777830	128778403
chr1	128778926	128779423
chr1	128846944	128847476
chr1	128847693	128847963
chr1	128848929	128850237
chr1	129395631	129396016
chr1	129396252	129397402
chr1	129398611	129399384
chr1	129440021	129440907
chr1	129770287	129770671
chr1	130032507	130033927
chr1	130203274	130204496
chr1	130320159	130320528
chr1	130491908	130492390
chr1	130493337	130493716
chr1	130496151	130496656
chr1	130535016	130535514
chr1	130538604	130539129
chr1	131307000	131307470
chr1	131374121	131374550
chr1	131682641	131683954
chr1	132131015	132131360
chr1	134125721	134127272
chr1	134127434	134128218
chr1	134128440	134129052
chr1	134129220	134129745
chr1	137062841	137063141
chr1	137064772	137065974
chr1	137149797	137150359
chr1	137277119	137277615
chr1	137339478	137341543
chr1	137345027	137345396
chr1	137345681	137345951
chr1	137348392	137348697
chr1	137713687	137714900
chr1	137715840	137716549
chr1	137979802	137980231
chr1	137983374	137984052
chr1	138305753	138306733
chr1	138307942	138308963
chr1	138527899	138528433
chr1	138789740	138790729
chr1	138792603	138793349
chr1	139118402	139119404
chr1	139727062	139727672
chr1	139911345	139911832
chr1	139957992	139958262
chr1	140109602	140110129
chr1	140110658	140111448
chr1	140215576	140216420
chr1	140516650	140517069
chr1	140517262	140517817
chr1	140646016	140646925
chr1	140710242	140711095
chr1	140712141	140712531
chr1	140818862	140819677
chr1	140819787	140820648
chr1	140821203	140821616
chr1	140821909	140822214
chr1	140823055	140823712
chr1	141037726	141037996
chr1	141038150	141038584
chr1	141040022	141040680
chr1	141041643	141041913
chr1	141193390	141195093
chr1	141195862	141196481
chr1	141265161	141265856
chr1	141266155	141266877
chr1	141701840	141702712
chr1	141925156	141925992
chr1	142357977	142358383
chr1	142358814	142359723
chr1	142361478	142362731
chr1	142587924	142588194
chr1	142980151	142980489
chr1	143326783	143327702
chr1	143328066	143329924
chr1	143382581	143383391
chr1	143384147	143384854
chr1	143508960	143509230
chr1	143712655	143713798
chr1	143866388	143867307
chr1	143867534	143868310
chr1	143890616	143890936
chr1	143893684	143894817
chr1	144068630	144069325
chr1	144091292	144091980
chr1	144323307	144324277
chr1	144325652	144326216
chr1	144388408	144388684
chr1	144458867	144459354
chr1	144459803	144461750
chr1	144461889	144462503
chr1	144463782	144464300
chr1	144676937	144677385
chr1	144677870	144678334
chr1	144807589	144807876
chr1	144810279	144811408
chr1	144811518	144812508
chr1	144812828	144813199
chr1	144855275	144855605
chr1	144856690	144858962
chr1	144859357	144859627
chr1	145103416	145103686
chr1	145104381	145104892
chr1	145176331	145176613
chr1	145177837	145178198
chr1	145254028	145254306
chr1	145474962	145475796
chr1	145782602	145783059
chr1	145797050	145798444
chr1	145798639	145799266
chr1	146004767	146006022
chr1	146006938	146007219
chr1	146008053	146008777
chr1	146008912	146010812
chr1	146121998	146122730
chr1	146124935	146126047
chr1	146192976	146193633
chr1	146397634	146398238
chr1	146398976	146399726
chr1	146399839	146400263
chr1	146401764	146402157
chr1	146604733	146605212
chr1	146606046	146608276
chr1	147282702	147283873
chr1	147284410	147284726
chr1	147284883	147286266
chr1	147287041	147287372
chr1	147499239	147500250
chr1	147500366	147500907
chr1	147592356	147593028
chr1	147671866	147672727
chr1	147673011	147673680
chr1	148168904	148169790
chr1	148220585	148220879
chr1	148366364	148367182
chr1	148379172	148379839
chr1	148380096	148382267
chr1	148383858	148384816
chr1	148456871	148457474
chr1	148457701	148458178
chr1	148459488	148459830
chr1	148460059	148460329
chr1	148461483	148462129
chr1	148489798	148490086
chr1	148517461	148518193
chr1	148520346	148521206
chr1	148542843	148543255
chr1	148543493	148544183
chr1	148878982	148879614
chr1	148881317	148881979
chr1	149183926	149184439
chr1	149300007	149300912
chr1	149301105	149301638
chr1	149301740	149302189
chr1	149302367	149302848
chr1	149396288	149397133
chr1	149398669	149399304
chr1	149451975	149452477
chr1	149453962	149454524
chr1	149454830	149455317
chr1	149456507	149456893
chr1	149506588	149506999
chr1	149508532	149509175
chr1	149509280	149509550
chr1	149509816	149510086
chr1	149512047	149512779
chr1	149516058	149516375
chr1	149516798	149517342
chr1	149587233	149588469
chr1	149601622	149603051
chr1	150235679	150236223
chr1	150275398	150275962
chr1	150276124	150276587
chr1	150278923	150279193
chr1	150280309	150280630
chr1	150338568	150338867
chr1	150341091	150341864
chr1	150342247	150342932
chr1	150524210	150524731
chr1	151865981	151866909
chr1	151867307	151867856
chr1	151868142	151868573
chr1	151868779	151869686
chr1	152246725	152247137
chr1	152462859	152463339
chr1	152463795	152464706
chr1	152664739	152665479
chr1	152665785	152666253
chr1	152667583	152668034
chr1	154013568	154014063
chr1	154021772	154022392
chr1	154455163	154456924
chr1	154903501	154903782
chr1	154967185	154967673
chr1	157260487	157260933
chr1	157880649	157881732
chr1	157933722	157934283
chr1	158150816	158151435
chr1	158333270	158334924
chr1	158335339	158336569
chr1	158336859	158337757
chr1	158337880	158338334
chr1	158643323	158643888
chr1	158644410	158644962
chr1	158647477	158648183
chr1	158885199	158886092
chr1	159024202	159024854
chr1	159027321	159028062
chr1	159974815	159975358
chr1	160421652	160422662
chr1	160424154	160424484
chr1	160816271	160816581
chr1	160817359	160817899
chr1	160818849	160819347
chr1	161429226	161429913
chr1	161934968	161935339
chr1	161935527	161936703
chr1	161938401	161938701
chr1	162117543	162118090
chr1	162119101	162119965
chr1	162266323	162266816
chr1	162267232	162267891
chr1	162338619	162340388
chr1	162344190	162344462
chr1	162800818	162802091
chr1	162822209	162822975
chr1	162824530	162825336
chr1	162841133	162842091
chr1	162844476	162844826
chr1	162844942	162845763
chr1	163242466	163242868
chr1	163279090	163279416
chr1	163715498	163716285
chr1	163784545	163785829
chr1	163786373	163786643
chr1	163788344	163789137
chr1	163807591	163807961
chr1	163810445	163811073
chr1	164724610	164725137
chr1	164725776	164726085
chr1	164726216	164726614
chr1	164739634	164741277
chr1	164742128	164742940
chr1	165028007	165028828
chr1	165031591	165032202
chr1	165269124	165269745
chr1	165407195	165408755
chr1	165409555	165410421
chr1	165529071	165530046
chr1	165530322	165531163
chr1	165531521	165532389
chr1	165533439	165533722
chr1	165970441	165970860
chr1	166178042	166178312
chr1	166179719	166179989
chr1	166470295	166470621
chr1	166471539	166472756
chr1	166601252	166601872
chr1	166602565	166602953
chr1	166603631	166605522
chr1	166767210	166767829
chr1	166872894	166873248
chr1	166873494	166874592
chr1	166912962	166914063
chr1	166914519	166914906
chr1	166917598	166918133
chr1	166989750	166990528
chr1	167198778	167199136
chr1	167202800	167203158
chr1	167477192	167477551
chr1	167825343	167825987
chr1	167836500	167837275
chr1	168625714	168626492
chr1	168627203	168627853
chr1	168646095	168646552
chr1	168857554	168857896
chr1	168988728	168989083
chr1	169109269	169110068
chr1	169112068	169112467
chr1	169112608	169113270
chr1	169141616	169142072
chr1	169190543	169191426
chr1	169339959	169340402
chr1	169545800	169546799
chr1	170117538	170118338
chr1	170120494	170120900
chr1	171858903	171859367
chr1	172733627	172734424
chr1	172736432	172736775
chr1	172736952	172737268
chr1	172883093	172883695
chr1	173179474	173179744
chr1	173256846	173257240
chr1	173787742	173788558
chr1	173788860	173789393
chr1	173791180	173791890
chr1	173836788	173837524
chr1	174233523	174234137
chr1	174255023	174255616
chr1	174258139	174258866
chr1	174260087	174260712
chr1	174280746	174281259
chr1	174786591	174787076
chr1	174946673	174948194
chr1	174977656	174978457
chr1	175011272	175011659
chr1	175011779	175012542
chr1	175043436	175044501
chr1	175087824	175088785
chr1	175844809	175845082
chr1	175846688	175846958
chr1	176287269	176288029
chr1	176544696	176545750
chr1	176548473	176548783
chr1	176649954	176651273
chr1	176898911	176899737
chr1	177213550	177215613
chr1	177216895	177217760
chr1	177218076	177218690
chr1	177656014	177656284
chr1	177658914	177659482
chr1	177904478	177905203
chr1	177930125	177931178
chr1	177933354	177935335
chr1	178058643	178059439
chr1	178061018	178061717
chr1	178082695	178083258
chr1	178084644	178085488
chr1	178174927	178175770
chr1	178176329	178177174
chr1	178178037	178178535
chr1	178499476	178500672
chr1	179271243	179271729
chr1	179691139	179692461
chr1	181265603	181266005
chr1	183541858	183542128
chr1	183542355	183542799
chr1	183567830	183568582
chr1	184638963	184639336
chr1	185160907	185161654
chr1	185621703	185622004
chr1	185624289	185624672
chr1	185626243	185626745
chr1	186104944	186105619
chr1	186108609	186109494
chr1	186594809	186596580
chr1	186870608	186873261
chr1	186873986	186874264
chr1	186874372	186874993
chr1	187063206	187064388
chr1	187065713	187066447
chr1	187066591	187067080
chr1	187067704	187068195
chr1	187068454	187069232
chr1	187395897	187397633
chr1	188339082	188339693
chr1	188339910	188341139
chr1	188374428	188374730
chr1	188608780	188609173
chr1	188611005	188612456
chr1	188923647	188924630
chr1	188924994	188925489
chr1	188926925	188927252
chr1	188927980	188928377
chr1	188928493	188928905
chr1	190614439	190614827
chr1	190616296	190617170
chr1	191870324	191870746
chr1	192467137	192467992
chr1	192468292	192469601
chr1	192572535	192573640
chr1	192573856	192574562
chr1	192574907	192575514
chr1	192575736	192576298
chr1	192576607	192577391
chr1	192577667	192577937
chr1	193075883	193076592
chr1	193227648	193227921
chr1	193808609	193809596
chr1	194083278	194084220
chr1	194084350	194084901
chr1	194085858	194086411
chr1	195054204	195054624
chr1	195054855	195056368
chr1	195248328	195249090
chr1	195324356	195324760
chr1	195371577	195372105
chr10	3109457	3109769
chr10	3109910	3110344
chr10	3111310	3114011
chr10	3114491	3115389
chr10	3116032	3117119
chr10	3246244	3246514
chr10	3252896	3253166
chr10	3318790	3319395
chr10	3625297	3626485
chr10	4193608	4194436
chr10	4194836	4195140
chr10	4834137	4834483
chr10	4916291	4917049
chr10	5092429	5092766
chr10	5093142	5093654
chr10	5389318	5389974
chr10	5390386	5391260
chr10	5394952	5395430
chr10	5581085	5582729
chr10	5583942	5584359
chr10	5584955	5585429
chr10	6655128	6655567
chr10	6657854	6659468
chr10	7413402	7413681
chr10	7427300	7427659
chr10	7428404	7428941
chr10	8144974	8146999
chr10	8312782	8313661
chr10	8315424	8315737
chr10	8546645	8546915
chr10	8600048	8600447
chr10	8601248	8601589
chr10	8601783	8602423
chr10	9851052	9851459
chr10	10029809	10033228
chr10	10083087	10083395
chr10	10083568	10083838
chr10	10570788	10571778
chr10	10572484	10572754
chr10	10586199	10587442
chr10	10588976	10589668
chr10	10589943	10590968
chr10	10669701	10670244
chr10	10670525	10670795
chr10	10823919	10824495
chr10	10956781	10957781
chr10	10960152	10960846
chr10	10975582	10977368
chr10	10978640	10978956
chr10	10979767	10980045
chr10	11221090	11221360
chr10	11221572	11222159
chr10	11222899	11223788
chr10	11352764	11353034
chr10	11371586	11372347
chr10	11372480	11373353
chr10	11374349	11374958
chr10	11583983	11584966
chr10	11638354	11638655
chr10	11696334	11696674
chr10	11857060	11858000
chr10	11860828	11861304
chr10	12268146	12268559
chr10	12270843	12271203
chr10	12271419	12272153
chr10	12388483	12389738
chr10	12395436	12395716
chr10	12999118	12999554
chr10	12999865	13001284
chr10	13002560	13003192
chr10	13898426	13899538
chr10	13899649	13900127
chr10	14709717	14710307
chr10	14711685	14712687
chr10	15124706	15125216
chr10	15125989	15126490
chr10	15339268	15340440
chr10	15351141	15351411
chr10	15382721	15383243
chr10	15599825	15600796
chr10	15622140	15622426
chr10	15622602	15623080
chr10	15624383	15625311
chr10	15625868	15626818
chr10	15639430	15640815
chr10	15641049	15641639
chr10	15776678	15777622
chr10	15777736	15778763
chr10	15891331	15892418
chr10	15895530	15895905
chr10	16660489	16660759
chr10	16692931	16693458
chr10	16695108	16695661
chr10	16695783	16696092
chr10	16696266	16697564
chr10	16773061	16773372
chr10	16773678	16774317
chr10	16775446	16776019
chr10	16822054	16822616
chr10	16825696	16826030
chr10	19270748	19271275
chr10	19271486	19272115
chr10	19385668	19386277
chr10	19783207	19783786
chr10	19784117	19784784
chr10	19785309	19786543
chr10	19799072	19799501
chr10	20459645	20460055
chr10	20645086	20645985
chr10	21213529	21213799
chr10	21642932	21643208
chr10	21646013	21646329
chr10	21647352	21648395
chr10	22438697	22439334
chr10	22622508	22622817
chr10	22683988	22684294
chr10	22684700	22685714
chr10	22687894	22688164
chr10	22688328	22688973
chr10	22734605	22734997
chr10	22738471	22738741
chr10	22798795	22799280
chr10	22862110	22863055
chr10	22863726	22864616
chr10	22939622	22940255
chr10	23472758	23473830
chr10	23484936	23485905
chr10	23486228	23487127
chr10	23505381	23505902
chr10	23528720	23529007
chr10	23623265	23624696
chr10	23871635	23872184
chr10	23876631	23876925
chr10	24689896	24690177
chr10	24690965	24691320
chr10	25101941	25102327
chr10	25104411	25105195
chr10	25418938	25420654
chr10	25624311	25624944
chr10	25625132	25625578
chr10	25938988	25939422
chr10	25939542	25939822
chr10	25940013	25941218
chr10	25941578	25942344
chr10	26128682	26129147
chr10	27262480	27262895
chr10	27356071	27356408
chr10	27358078	27359445
chr10	27404192	27404481
chr10	27462833	27464129
chr10	27814434	27814986
chr10	27822932	27823626
chr10	28043764	28044553
chr10	28196343	28196777
chr10	28528093	28528608
chr10	28528729	28529878
chr10	28531148	28531554
chr10	28531870	28532959
chr10	28707554	28708127
chr10	28709658	28710597
chr10	28936033	28936325
chr10	29186018	29186993
chr10	29436980	29437848
chr10	29619696	29620325
chr10	29622318	29624053
chr10	29624275	29625104
chr10	29677462	29678445
chr10	29761009	29761621
chr10	29927003	29928847
chr10	29963973	29964617
chr10	30221697	30222821
chr10	30484059	30484329
chr10	30553506	30554074
chr10	30570823	30571093
chr10	30575650	30576162
chr10	30816673	30818416
chr10	30820523	30820847
chr10	31057143	31058562
chr10	31058702	31059523
chr10	31091822	31092445
chr10	31094979	31095484
chr10	31410211	31410863
chr10	31487514	31487881
chr10	31672831	31673101
chr10	31752367	31753256
chr10	31980962	31981358
chr10	31997268	31999404
chr10	32041217	32042458
chr10	32503160	32503594
chr10	32818068	32818661
chr10	32819459	32819974
chr10	32820703	32821734
chr10	32838668	32839200
chr10	32967184	32968051
chr10	32969241	32970204
chr10	32970630	32971503
chr10	33503312	33505452
chr10	33576208	33577100
chr10	33577659	33578543
chr10	33641045	33641471
chr10	33825025	33825595
chr10	33825732	33826057
chr10	33887820	33888101
chr10	33890461	33890789
chr10	34440513	34440887
chr10	34743768	34745034
chr10	34747046	34747446
chr10	35311179	35312667
chr10	35314527	35314928
chr10	35315198	35316257
chr10	35353323	35354221
chr10	35515410	35515959
chr10	35517056	35518005
chr10	35518233	35518790
chr10	35638475	35639074
chr10	35680382	35682241
chr10	36166011	36166379
chr10	36639477	36639747
chr10	36641742	36642361
chr10	36642472	36643525
chr10	36822112	36822911
chr10	36945939	36946304
chr10	37038569	37039079
chr10	37703538	37704539
chr10	37732328	37733143
chr10	37733267	37733675
chr10	37734346	37734831
chr10	37735362	37735965
chr10	37746824	37747453
chr10	37936753	37937561
chr10	37937710	37938299
chr10	37968649	37969647
chr10	38261222	38261735
chr10	38262597	38263970
chr10	38269920	38271219
chr10	38385944	38386633
chr10	38742010	38742282
chr10	38768766	38769618
chr10	38769928	38770198
chr10	38772201	38772889
chr10	38933750	38934705
chr10	38951575	38953426
chr10	38953528	38953814
chr10	38954114	38955539
chr10	38955795	38956481
chr10	41310515	41311375
chr10	41314807	41315481
chr10	41840865	41841725
chr10	41842903	41843472
chr10	41844476	41845036
chr10	41846373	41846698
chr10	42375130	42376807
chr10	42377950	42378379
chr10	42378646	42379856
chr10	43562623	43563097
chr10	44909741	44910177
chr10	44910514	44911004
chr10	44911134	44911609
chr10	45518128	45519210
chr10	45520076	45520576
chr10	45522676	45522977
chr10	45524069	45524615
chr10	45536310	45536623
chr10	45556579	45556926
chr10	45557968	45558238
chr10	45737607	45738377
chr10	45843022	45845127
chr10	46137627	46138062
chr10	46138888	46139228
chr10	46468513	46469545
chr10	46470035	46470578
chr10	46470735	46471804
chr10	46966970	46967652
chr10	46970604	46971171
chr10	47069565	47070184
chr10	47070415	47070762
chr10	47071174	47071947
chr10	47225013	47225286
chr10	47440255	47440902
chr10	47442370	47442767
chr10	47444211	47444747
chr10	47665776	47667220
chr10	47803045	47804715
chr10	47913898	47914168
chr10	48232121	48232641
chr10	48827170	48827590
chr10	49225062	49225797
chr10	49228551	49229313
chr10	49824274	49825014
chr10	49826102	49826721
chr10	49828937	49829418
chr10	50029945	50030539
chr10	50033647	50034025
chr10	50064131	50064821
chr10	50109181	50109876
chr10	50111007	50112471
chr10	50112694	50115293
chr10	50178827	50180200
chr10	50257449	50257949
chr10	50291730	50293059
chr10	50364660	50365249
chr10	50493771	50494305
chr10	50673385	50674035
chr10	50676119	50677187
chr10	51034682	51035788
chr10	51036671	51037501
chr10	51038129	51040968
chr10	51127424	51128112
chr10	51130904	51131811
chr10	51224555	51226417
chr10	51746079	51746426
chr10	51887312	51887737
chr10	51998309	51999021
chr10	52054779	52055055
chr10	52057867	52058583
chr10	52112070	52112804
chr10	52138744	52139128
chr10	52208822	52209803
chr10	52210071	52210360
chr10	52495492	52495762
chr10	52496491	52496982
chr10	52497635	52498052
chr10	52763247	52763571
chr10	52764156	52765552
chr10	52949075	52949429
chr10	53246890	53247502
chr10	53671378	53672221
chr10	54146088	54146369
chr10	54146776	54147599
chr10	54147900	54148341
chr10	54592979	54593324
chr10	54615462	54617311
chr10	54617571	54618019
chr10	54901929	54902673
chr10	54905774	54906132
chr10	54907241	54907601
chr10	55498172	55499438
chr10	55500010	55501658
chr10	55501800	55502499
chr10	55576351	55579851
chr10	55845561	55846384
chr10	55898391	55899504
chr10	56034118	56034826
chr10	56140321	56141310
chr10	56254398	56255795
chr10	56256272	56256542
chr10	56287401	56288165
chr10	56292769	56293574
chr10	56576460	56577167
chr10	56701729	56702814
chr10	56703189	56704209
chr10	56725508	56726064
chr10	57104096	57104368
chr10	57140432	57141204
chr10	57141385	57141923
chr10	57143366	57143636
chr10	57241320	57241847
chr10	57242946	57243260
chr10	57330078	57332458
chr10	57626781	57627085
chr10	57683715	57684080
chr10	57767339	57767661
chr10	57771819	57772467
chr10	58763554	58763824
chr10	58764172	58765588
chr10	59028053	59028739
chr10	59384349	59385368
chr10	60547743	60548515
chr10	60549396	60550452
chr10	60551525	60551829
chr10	60552032	60552686
chr10	63108049	63108833
chr10	63217190	63217951
chr10	63509025	63510281
chr10	63516582	63517336
chr10	63664253	63664569
chr10	63664715	63664989
chr10	63723581	63724522
chr10	63724667	63725669
chr10	63725922	63726908
chr10	63727657	63728056
chr10	64773662	64774962
chr10	64776846	64777203
chr10	64777421	64777845
chr10	64779189	64779459
chr10	64861034	64861326
chr10	65166608	65167284
chr10	65167909	65168635
chr10	65169321	65170511
chr10	65384478	65384969
chr10	65387058	65387738
chr10	65387849	65388393
chr10	65593916	65594493
chr10	65642039	65642652
chr10	65643382	65643672
chr10	65658850	65659871
chr10	65901800	65902515
chr10	65939820	65940186
chr10	65941802	65943523
chr10	65953051	65953747
chr10	66075606	66076107
chr10	66077523	66078085
chr10	66093203	66093591
chr10	66308866	66309136
chr10	66462538	66463486
chr10	66463744	66465302
chr10	66582860	66583225
chr10	66585791	66586487
chr10	66587022	66588093
chr10	66724860	66725548
chr10	69030644	69032278
chr10	69051372	69052228
chr10	69199759	69201100
chr10	69201445	69201715
chr10	70795737	70797210
chr10	70883609	70884308
chr10	70885161	70885755
chr10	70887378	70887648
chr10	71013173	71013508
chr10	71014515	71015434
chr10	71511278	71511888
chr10	71580498	71580878
chr10	71585472	71585743
chr10	71585962	71586783
chr10	71586898	71588985
chr10	71591149	71591762
chr10	71607901	71608648
chr10	71632136	71632948
chr10	71694256	71695067
chr10	71696039	71696316
chr10	71697686	71698004
chr10	71819170	71820159
chr10	71822180	71823131
chr10	71841706	71841976
chr10	72008912	72009254
chr10	72297570	72298369
chr10	72458680	72459612
chr10	72497766	72498182
chr10	73194203	73194964
chr10	73221171	73221488
chr10	73291937	73293543
chr10	73438604	73439590
chr10	73439857	73440211
chr10	73577787	73578211
chr10	73580435	73580999
chr10	73581185	73581693
chr10	73767678	73768080
chr10	73965469	73966116
chr10	74344995	74345460
chr10	74435566	74436208
chr10	74769349	74770122
chr10	74772280	74772571
chr10	74774150	74774490
chr10	74858102	74859413
chr10	76520047	76520493
chr10	76520761	76521212
chr10	77952480	77953663
chr10	77955394	77956481
chr10	78021515	78022043
chr10	78024269	78024812
chr10	78731766	78732121
chr10	78734534	78735704
chr10	78804544	78805666
chr10	78807325	78808625
chr10	78820468	78820912
chr10	78821091	78821550
chr10	78941114	78941960
chr10	78942525	78943214
chr10	78944016	78944632
chr10	78945875	78946837
chr10	79084348	79085438
chr10	79208925	79209310
chr10	79398739	79399825
chr10	79444630	79445516
chr10	80977303	80978697
chr10	80979876	80980668
chr10	81672610	81672941
chr10	81673248	81673817
chr10	81832858	81833164
chr10	81971293	81972260
chr10	82532207	82532858
chr10	83673130	83673464
chr10	83673985	83674285
chr10	83675852	83676593
chr10	83771670	83772298
chr10	83772624	83773566
chr10	83790145	83791121
chr10	83791696	83792221
chr10	84156148	84157760
chr10	84174574	84175039
chr10	84176030	84177010
chr10	84177360	84177696
chr10	84179293	84179907
chr10	84747212	84747605
chr10	85859026	85859672
chr10	85860044	85861794
chr10	86236386	86236927
chr10	86237315	86238214
chr10	87067766	87068544
chr10	87068720	87069525
chr10	87070407	87070946
chr10	87135532	87136196
chr10	87178704	87179777
chr10	87404127	87405245
chr10	87990643	87991306
chr10	88098473	88098743
chr10	88098911	88099286
chr10	88099498	88100229
chr10	88100377	88101705
chr10	88652179	88653058
chr10	88965984	88966422
chr10	89200008	89200278
chr10	89200548	89201081
chr10	89202456	89203168
chr10	89958906	89959242
chr10	89960766	89961204
chr10	89961425	89961869
chr10	89962829	89963341
chr10	90217597	90218267
chr10	90250178	90251052
chr10	90252435	90252736
chr10	90254169	90254523
chr10	90326166	90326780
chr10	91026108	91027014
chr10	91333864	91334557
chr10	91335203	91335969
chr10	91336553	91336823
chr10	91338337	91338670
chr10	91930057	91930874
chr10	91933068	91933463
chr10	91934145	91934761
chr10	92911008	92912730
chr10	93056658	93057735
chr10	93058256	93058526
chr10	93942948	93943218
chr10	94362659	94363258
chr10	94363365	94363714
chr10	94365082	94365462
chr10	94368088	94368383
chr10	94592434	94592704
chr10	96194279	96194904
chr10	96197958	96198688
chr10	96506871	96507565
chr10	96509760	96510172
chr10	96668673	96669805
chr10	96670016	96671208
chr10	96671447	96672446
chr10	96672734	96673165
chr10	97181922	97182554
chr10	97183616	97184503
chr10	97184616	97185351
chr10	97185654	97186018
chr10	97325457	97326154
chr10	97999527	98000108
chr10	98429831	98430101
chr10	98545939	98547157
chr10	98548760	98549910
chr10	98605055	98605445
chr10	99069392	99070290
chr10	99070412	99073096
chr10	99341215	99341743
chr10	99342636	99344349
chr10	99345170	99345721
chr10	99723865	99724777
chr10	99733454	99734058
chr10	99734527	99735426
chr10	99736900	99737170
chr10	99737349	99738125
chr10	99739830	99740107
chr10	99888755	99889025
chr10	100218341	100219061
chr10	100388500	100389026
chr10	100675480	100676183
chr10	100680874	100681239
chr10	101315227	101315497
chr10	101446104	101446718
chr10	101571947	101572860
chr10	102192794	102193390
chr10	102316904	102317341
chr10	102319049	102320252
chr10	102429380	102429898
chr10	102431320	102433102
chr10	103207727	103207997
chr10	103209217	103209490
chr10	103210512	103210791
chr10	103211173	103212343
chr10	103212483	103213434
chr10	103237760	103238805
chr10	103516860	103517142
chr10	103658976	103659309
chr10	103660474	103661169
chr10	103749523	103751029
chr10	103751308	103752667
chr10	103868147	103868417
chr10	103869942	103871716
chr10	103996387	103996868
chr10	104026490	104027201
chr10	104230008	104230533
chr10	104230903	104231173
chr10	104231574	104231987
chr10	104232097	104233394
chr10	104233547	104234157
chr10	104240036	104240543
chr10	104494542	104495256
chr10	104496819	104498432
chr10	104543625	104544273
chr10	104544751	104545186
chr10	104556972	104557323
chr10	104559158	104559642
chr10	104748308	104749553
chr10	104752661	104754057
chr10	104765591	104766890
chr10	104767079	104767561
chr10	104770085	104770733
chr10	104820333	104820992
chr10	104821495	104821773
chr10	104822078	104822637
chr10	104823103	104823416
chr10	104837418	104838466
chr10	104839642	104840763
chr10	104842308	104842578
chr10	104894655	104895603
chr10	104995923	104996193
chr10	104997938	105000330
chr10	105177978	105178459
chr10	105673091	105673762
chr10	105675200	105676121
chr10	105919110	105920688
chr10	105924306	105924885
chr10	106080302	106081139
chr10	106082057	106082799
chr10	106083164	106083953
chr10	106085110	106086419
chr10	106189210	106189657
chr10	106206885	106207825
chr10	106207975	106208412
chr10	106209366	106209737
chr10	106313886	106314500
chr10	106318113	106319213
chr10	106392523	106393369
chr10	106398170	106398440
chr10	106399980	106401348
chr10	106402506	106402863
chr10	106436202	106436563
chr10	106533513	106533888
chr10	107132616	107133206
chr10	107133763	107134647
chr10	107327279	107327648
chr10	107328488	107329591
chr10	107367719	107368202
chr10	107370204	107371367
chr10	107555488	107557444
chr10	107558395	107559001
chr10	107559291	107560408
chr10	107848366	107850192
chr10	107850380	107851134
chr10	107852075	107852684
chr10	107979808	107980741
chr10	108000624	108000988
chr10	108003354	108003833
chr10	108004396	108005073
chr10	109087622	109088522
chr10	109315586	109316194
chr10	109316414	109316750
chr10	109317010	109317446
chr10	109317656	109320080
chr10	109320277	109321229
chr10	109942701	109943189
chr10	109944148	109945509
chr10	110107809	110108142
chr10	110110720	110111087
chr10	110208170	110208574
chr10	110229497	110229898
chr10	110365613	110366748
chr10	110366937	110367543
chr10	110367988	110368460
chr10	110505092	110505483
chr10	110507976	110508491
chr10	110508631	110509075
chr10	110512237	110513238
chr10	110630870	110631820
chr10	110684040	110685347
chr10	110685462	110686186
chr10	110688912	110689311
chr10	110699681	110700273
chr10	112054667	112055422
chr10	112057849	112058238
chr10	112167470	112168252
chr10	112169105	112169920
chr10	112427555	112428235
chr10	112428553	112429239
chr10	112508997	112509410
chr10	112589714	112590079
chr10	112591007	112592361
chr10	112720406	112720746
chr10	112866882	112867657
chr10	112869422	112869823
chr10	112869979	112870375
chr10	113383627	113383977
chr10	113386635	113387177
chr10	113387282	113388435
chr10	113723027	113723349
chr10	113726193	113726668
chr10	113726907	113728207
chr10	113728801	113729122
chr10	114536875	114537492
chr10	114539756	114541096
chr10	114818424	114818947
[truncated: 13,793 more rows]

## Sheet: ChIP peaks, post-meiotic
chromosome	start	end
chr1	12644636	12644984
chr1	44951085	44951433
chr1	102628096	102628301
chr1	134560335	134560585
chr1	134588778	134588983
chr1	191120806	191121149
chr10	37263583	37263927
chr11	25099955	25100325
chr11	69399810	69400435
chr11	69400579	69402401
chr11	69403459	69404494
chr11	104528140	104528482
chr11	104550308	104550514
chr11	109011564	109012114
chr12	3109773	3110205
chr12	78350817	78351164
chr12	120028716	120028990
chr13	44869454	44869816
chr13	44869935	44870146
chr13	77438796	77439140
chr13	112578062	112578414
chr13	119598913	119599254
chr13	120321394	120321707
chr14	19415620	19419652
chr14	86198903	86199108
chr14	104336806	104337185
chr14	104715714	104716037
chr14	107075168	107075505
chr14	124801509	124801935
chr15	47539880	47540218
chr15	75086365	75086975
chr16	11143954	11144313
chr16	17222191	17222540
chr16	18533086	18533435
chr16	35981572	35981935
chr16	57391162	57391731
chr16	98107473	98107828
chr17	4626042	4626717
chr17	39846118	39848275
chr17	56199869	56200219
chr17	81838217	81838560
chr18	45055899	45056221
chr18	54699044	54699266
chr18	68692067	68692292
chr19	61331241	61331553
chr2	5379140	5379479
chr2	20899910	20900240
chr2	22744711	22745026
chr2	60402623	60402968
chr2	73867943	73868155
chr2	98662153	98663051
chr2	98663695	98664114
chr2	98664938	98665314
chr2	98666151	98667406
chr3	5860268	5860880
chr3	153123644	153123968
chr3	159939391	159939634
chr4	70378012	70378354
chr4	72027848	72028163
chr5	146260883	146261437
chr6	3200750	3201679
chr6	10186250	10186593
chr6	49236343	49236707
chr6	103649007	103649388
chr6	125876792	125877269
chr6	132463578	132463932
chr6	145932796	145933106
chr7	38525391	38525718
chr7	98059888	98060235
chr8	3754276	3754482
chr8	66312488	66312832
chr8	85111742	85112070
chr9	2999961	3001617
chr9	3001927	3002456
chr9	3002588	3003765
chr9	3003923	3004358
chr9	3004476	3004885
chr9	3005674	3006010
chr9	3006216	3007650
chr9	3007882	3008184
chr9	3008387	3008696
chr9	3009198	3010186
chr9	3010729	3011130
chr9	3011507	3011882
chr9	3012094	3012488
chr9	3012666	3013529
chr9	3013723	3014427
chr9	3014693	3014996
chr9	3015173	3015598
chr9	3015682	3016246
chr9	3016445	3016745
chr9	3016876	3017345
chr9	3017751	3018828
chr9	3019137	3019443
chr9	3019719	3021231
chr9	3021471	3021763
chr9	3021891	3022740
chr9	3023350	3025254
chr9	3025403	3026088
chr9	3026269	3026812
chr9	3027019	3027358
chr9	3027442	3028307
chr9	3028390	3029120
chr9	3029350	3029936
chr9	3030478	3031008
chr9	3031140	3031469
chr9	3031547	3032950
chr9	3033581	3034027
chr9	3034293	3035473
chr9	3035677	3036443
chr9	3037060	3037568
chr9	3037801	3038333
chr9	3258697	3259046
chr9	19575298	19575643
chr9	24541914	24542272
chr9	35305134	35305669
chr9	56223643	56224017
chr9	62608454	62608796
chr9	78480958	78481163
chr9	110281130	110281496
chr9	123461812	123462218
chrX	106186749	106187184
chrX	122831253	122831588
chrX	143482887	143483229
