# Supplementary material for: Widespread association of the Argonaute protein AGO2 with meiotic chromatin suggests a distinct nuclear function in mammalian male reproduction
Source: HighWire-hosted journal article supplement (doi:10.1101/gr.276578.122), 2022-09-01
Supplement: Supplemental_Table_S4.xlsx [file Supplemental_Table_S4.xlsx]

## Sheet: Sheet1
Shared AGO2 CLIP/ChIP targets
Xkr4
St18
Sntg1
Cpa6
Col19a1
Adgrb3
4931428L18Rik
Khdrbs2
Dnah7a
Hecw2
Ankrd44
Pard3b
Creb1
Erbb4
Spag16
Phlpp1
Ptpn4
Rabgap1l
Dnm3
Pou2f1
Desi2
Smyd3
Ush2a
Hhat
Syne1
Utrn
Ptprk
Nkain2
Tbc1d32
Sh3rf3
Mypn
Ctnna3
Pcdh15
Syn3
Anks1b
Abca13
Zpbp
Sgcd
Asic2
Stxbp4
Car10
Cep112
Tbcd
Atxn7l1
Hdac9
Dgkb
Npas3
Slc25a21
Mdga2
2700049A03Rik
Kcnh5
Rgs6
Nrxn3
Tdrd9
Ptprn2
Dip2c
Chrm3
Sugct
Cdkal1
Gmds
Cntnap3
2210408I21Rik
Polr3g
Arhgef28
Pde4d
Rab3c
Fhit
Erc2
Cacna2d3
Nrg3
Lrch1
Enox1
Klf12
Gpc5
Hs6st3
Fgf14
Ghr
C6
Pdzd2
Drosha
Cdh6
Cdh12
Rgs22
Rims2
Col22a1
Pdzrn4
Snx29
Prkdc
Fgd4
Vps8
Fgf12
Dlg1
Kalrn
Zbtb20
Epha6
Cadm2
Fbxl17
Ptprm
Camkmt
Nrxn1
Chst9
Nol4
Dtna
Sil1
Pcdha1
Pcdha3
Pcdha4
Pcdha5
Pcdha6
Pcdha7
Pcdha8
Pcdha9
Pcdha2
Gm37013
Pcdha11
Pcdha12
Ppp2r2b
Piezo2
Setbp1
Dok6
Trpm3
Prkg1
Sgms1
Rnls
Crtac1
Fam171a1
Camk1d
Slc39a12
Plxdc2
Etl4
Gpsm1
Lrp1b
Xirp2
Cers6
Myo3b
Ttn
Lrrc4c
Fmn1
Mal
Plcb4
Macrod2
Kif16b
Pcsk2
Ptprt
Mrps28
Pag1
Ralyl
Nlgn1
Mecom
Nbea
Zbbx
Fstl5
Lrba
Spag17
Kcnd3
Vav3
Dpyd
Ank2
2610301B20Rik
Nkain3
Lingo2
Trim14
Grin3a
Ptprd
Adamtsl1
Lepr
Agbl4
Skint6
Cdk14
Cfap69
Zfp804b
Sema3d
Sema3e
Cacna2d1
Magi2
Reln
Dpp6
Sorcs2
Clnk
Ldb2
Kcnip4
Adgrl3
Tmem132d
Auts2
Ica1
Kcnd2
Cadps2
Grm8
Exoc4
Cntnap2
Creb5
Pde1c
Grid2
Ctnna2
Exoc6b
Suclg2
Cntn3
Ret
Ano2
Oca2
Gabrg3
Otud7a
Fam189a1
Grm5
Dlg2
Sox6
Xylt1
Dlgap2
Csmd1
Nrg1
Dlc1
Fgl1
Galntl6
Spock3
Phkb
Cntnap4
Vat1l
Wwox
Cdh13
Cntn5
Fat3
Bbs9
Opcml
Ntm
Gldnos
Thsd4
Clstn2
Ephb1
Dock3
2900079G21Rik
Osbpl10
Rbms3
Tenm1
Hs6st2
Fgf13
Dmd
Zc3h12b
Eda
Diaph2
Lhfpl1
Phex
Reps2
Frmpd4
Arhgap6
Ncoa2
Map2
Traf3ip1
Dpp10
Thsd7b
Gm16083
Dennd1b
Cdc73
Brinp3
Rgl1
Adcy10
Fmn2
Sdccag8
Gm28905
Gm30228
Sesn1
Ascc3
Fam184a
Cdh23
Ano4
Lrriq1
Nav3
Trhde
Lgr5
Sertad2
Slit3
Plcd3
Prkca
2610035D17Rik
Tmem94
Immp2l
Ralgapa1
Arid4a
9630002D21Rik
Gphn
Cep128
Ttc7b
Zfp935
Fancc
Mast4
Vwa8
Cdh18
Gm35996
Angpt1
Pkhd1l1
Csmd3
Khdrbs3
Atp13a5
Cmss1
Csnka2ip
Zfp654
Tiam1
Hlcs
2700054A10Rik
Tbc1d5
Cntnap5c
Zeb1
Myo5b
Kcnh7
Ttc21b
Sestd1
Cwc22
D430041D05Rik
Sema6d
Gm14244
Naaladl2
Ntng1
6530403H02Rik
Gm26691
Wdr63
Pigk
Cnbd1
Astn2
Saxo1
Tek
Csmd2
Gsap
Poln
Stk32b
Atp8a1
Cox7b2
Slc4a4
Lrrc8d
Fam216a
Foxp2
Zfp619
A230057D06Rik
Gm32647
Tenm4
Stk33
Parva
4933406I18Rik
Ate1
Sgcz
Ccdc110
Gm1715
Mei4
Slc9a9
Gk5
Scml2
Prex2
A830018L16Rik
Pkhd1
Dst
Tmeff2
9330175M20Rik
9130227L01Rik
Aox2
Vwc2l
Abca12
Col4a4
Pid1
Pign
Tnfrsf11a
Cntnap5a
Nckap5
Kcnt2
Colgalt2
Cacna1e
Rasal2
Brinp2
Fmo1
Ddr2
Rgs7
Pld5
Spata17
Ust
Stxbp5
Grm1
Pde7b
Epb41l2
Themis
Ncoa7
Lama4
Fig4
Bicc1
Trpm2
Apaf1
Cfap54
Mgat4c
Acss3
Srgap1
Ppm1h
Wdpcp
Dock2
Tenm2
Shisa6
Sdk2
Nbas
Lpin1
Sntg2
Prkar2b
Akap6
Lrfn5
Rad51b
Dcaf5
Tshr
Catsperb
Tc2n
Adarb2
2610307P16Rik
Lyrm4
A530065N20Rik
Fam172a
Adgrv1
Rasgrf2
Zswim6
Kcnma1
Arhgap22
Grid1
Atp8a2
Spata13
Diaph3
Pcdh9
Gpc6
Pcca
Nalcn
Itgbl1
Plcxd3
Adamts12
Fbxl7
Ctnnd2
Sema5a
Cpq
Stk3
Vps13b
Sybu
Samd12
Sntb1
Slc22a22
Kcnq3
Tbc1d22a
Gtsf1
Grin2a
Il1rap
Ccdc50
Itgb5
Gm15802
Lsamp
4932412D23Rik
Btla
Epha3
Tmprss15
Grik1
4930452A19Rik
Rcan2
Supt3
Adgre1
Tmem232
Dlgap1
Alk
Lclat1
Slc8a1
Fshr
Mpp7
AW554918
Rit2
Myo7b
Camk4
Ctnna1
Pcdhac1
Kcnn2
A330093E20Rik
G630055G22Rik
Megf10
Adamts19
Smim3
Dctn4
Alpk2
Dcc
Zbtb7c
Slc14a2
Atp9b
1700030N03Rik
Ms4a6d
Gnaq
Prune2
Pgm5
Asah2
A830019P07Rik
Cfap43
Sorcs1
Frmd4a
Celf2
Sfmbt2
Itga8
St8sia6
Cacnb2
Msrb2
Gpr158
Phf19
Arhgap15
Gtdc1
Epc2
Galnt13
Upp2
Tanc1
Slc4a10
4932414N04Rik
Mettl8
Chn1
Pde1a
Ext2
Pax6os1
Ano3
Slc12a6
Ryr3
Fbn1
Sptlc3
Dtd1
Zfp442
Pld1
Egfem1
Kcnmb2
Lhfp
P2ry12
Med12l
Kcnab1
Lekr1
Rsrc1
Gm20754
Gria2
Sycp1
Gm6602
D030025E07Rik
Col25a1
Bmpr1b
Ak5
Negr1
Lrrc7
Fam110b
1700123O12Rik
Cngb3
Atp8b5
Stra6l
Svep1
Rgs3
Cdk5rap2
Mpdz
Frem1
Snapc3
Ccdc171
Cntln
Focad
Atg4c
Dab1
4930522H14Rik
Elavl4
Kif1b
Akap9
Gnai1
4930584F24Rik
Lmbr1
Dpysl5
Fam184b
Slit2
Adgra3
Nwd2
Limch1
Tmem33
Yipf7
Gabrg1
Gabrb1
Gc
Scarb2
Antxr2
Arhgap24
Hfm1
Oas1c
Tmem132b
Tmem132c
Sdk1
Flt3
Nxph1
Phf14
Cped1
Snd1
Chchd3
Ccser1
Polr1a
9130221F21Rik
Dnah6
Lrrtm4
Alms1
Frmd4b
Cntn4
Itpr1
Grm7
Rad18
1700030F04Rik
Eps8
Slco1a6
Snrpn
Apba2
Sv2b
Akap13
Agbl1
Nox4
Tmem135
Syt9
A730082K24Rik
Abca16
Gsg1l
Adam12
Stk32c
Fam155a
Zmat4
Tenm3
Psd3
Csgalnact1
Nr3c2
Arhgap10
Anapc10
Fto
Ces1c
Ces1g
Cdh8
Pdgfd
Mmp10
Mmp20
Gramd1b
Ddx10
Elmod1
Scaper
4930502A04Rik
Aldh1a2
Tcf12
Unc13c
Bckdhb
Rasgrf1
E330023G01Rik
Pik3r4
Scn10a
Cask
Gria3
Enox2
Gpc3
Mcf2
Aff2
Il1rapl1
Pcyt1b
Asb12
Tex11
Phka1
Slc16a2
Pcdh11x
Il1rapl2
Vsig1
Tmem164
Trpc5
Sat1
Kdm5d
