# Supplementary material for: Widespread association of the Argonaute protein AGO2 with meiotic chromatin suggests a distinct nuclear function in mammalian male reproduction
Source: HighWire-hosted journal article supplement (doi:10.1101/gr.276578.122), 2022-09-01
Supplement: Supplemental_Table_S6.xlsx [file Supplemental_Table_S6.xlsx]

## Sheet: post-meiotic vs. meiotic, WT
Differentially expressed proteins: post-meiotic vs. meiotic wild type male germ cells
								Normalized abundance
								Cell Type A (meiotic) Control					Cell Type B (post-meiotic) Control
Accession	Peptide count	Unique peptides	Confidence score	Anova (p)	Highest mean condition	Mass	Description	QEp21-2796_Lesch_WTP2	QEp21-2811_Lesch_WTP1	QEp21-3081_Lesch_WTP1	QEp21-3169_Lesch_WTP2	Average	QEp21-0251_Lesch_WTRSP1	QEp21-0256_Lesch_WTRSP2	QEp21-0271_Lesch_WTRSP3r	Average	Mean Ratio (CellTypeBControl/CellTypeAControl)	log2(mean of ratio[CellTypeBControl/CellTypeAControl])	minus log (Anova p)
ENSMUST00000097530	2	2	126.49	6.31937e-06	Cell Type A Control	64142	ENSMUST00000097530	663064	558578	535116	767280	631009	54018.4	70389.6	63677.6	62695.2	0.099357	-3.33123	5.19933
ENSMUST00000074156	13	13	761.95	1.14122e-05	Cell Type B Control	55038	ENSMUST00000074156	1.27261e+06	1.00532e+06	1.2575e+06	1.15961e+06	1.17376e+06	4.76228e+06	5.85676e+06	6.01236e+06	5.5438e+06	4.72311	2.23974	4.94263
ENSMUST00000117564	5	4	215.43	5.03645e-05	Cell Type B Control	584262	ENSMUST00000117564	146158	140468	140225	128831	138921	906087	627950	564390	699476	5.03507	2.33201	4.29788
ENSMUST00000154207	24	24	2027.27	5.12938e-05	Cell Type B Control	27568	ENSMUST00000154207	2.35017e+08	2.42983e+08	2.48107e+08	2.39549e+08	2.41414e+08	5.78988e+08	4.90228e+08	6.40196e+08	5.69804e+08	2.36028	1.23896	4.28994
ENSMUST00000107398	4	4	156.49	7.88221e-05	Cell Type B Control	29763	ENSMUST00000107398	588999	541224	446022	458077	508580	1.33109e+06	1.2519e+06	1.33586e+06	1.30628e+06	2.56849	1.36092	4.10335
ENSMUST00000025835	2	2	103.9	8.00326e-05	Cell Type A Control	88195	ENSMUST00000025835	499870	453057	407319	539458	474926	124375	80631.6	110110	105039	0.221169	-2.17678	4.09673
ENSMUST00000020173	5	5	201.78	0.000119274	Cell Type B Control	81924	ENSMUST00000020173	651724	608470	612423	459076	582923	1.74191e+06	2.17315e+06	1.7768e+06	1.89729e+06	3.25478	1.70256	3.92345
ENSMUST00000021802	8	8	480.15	0.000148658	Cell Type B Control	52829	ENSMUST00000021802	4.23416e+06	4.47154e+06	5.33662e+06	5.4752e+06	4.87938e+06	1.14729e+07	1.03817e+07	1.13795e+07	1.10781e+07	2.27038	1.18294	3.82781
ENSMUST00000035055	32	32	2358.6	0.000153271	Cell Type B Control	117357	ENSMUST00000035055	3.16443e+07	3.0356e+07	3.6782e+07	3.51552e+07	3.34844e+07	6.71064e+07	5.99648e+07	6.03114e+07	6.24609e+07	1.86537	0.899466	3.81454
ENSMUST00000028083	12	12	743.76	0.000247655	Cell Type B Control	29872	ENSMUST00000028083	1.4372e+07	1.65833e+07	1.50348e+07	1.26813e+07	1.46679e+07	3.22039e+07	3.05921e+07	3.90521e+07	3.39494e+07	2.31454	1.21073	3.60615
ENSMUST00000022386	4	4	223.29	0.000283844	Cell Type B Control	78310	ENSMUST00000022386	168295	190008	190630	267382	204079	998152	885731	653494	845792	4.14444	2.05118	3.54692
ENSMUST00000066587	3	3	89.49	0.000335328	Cell Type A Control	74670	ENSMUST00000066587	419282	231528	259760	597693	377066	35252	28646.1	38140.4	34012.9	0.0902041	-3.47066	3.47453
ENSMUST00000002289	17	17	1636.35	0.000384216	Cell Type B Control	26135	ENSMUST00000002289	3.85204e+07	4.20377e+07	4.6648e+07	3.6076e+07	4.08205e+07	7.51643e+07	7.65985e+07	8.95446e+07	8.04358e+07	1.97047	0.978543	3.41542
ENSMUST00000090042	4	4	163.48	0.000389298	Cell Type A Control	63768	ENSMUST00000090042	1.93672e+06	1.57385e+06	1.40944e+06	1.40753e+06	1.58189e+06	545503	497430	687875	576936	0.364714	-1.45516	3.40972
ENSMUST00000229585	2	2	117.4	0.000408818	Cell Type B Control	99318	ENSMUST00000229585	453020	339374	185550	422162	350027	2.50126e+06	2.31438e+06	2.68195e+06	2.4992e+06	7.14001	2.83593	3.38847
ENSMUST00000121418	2	2	120.84	0.000538981	Cell Type B Control	35397	ENSMUST00000121418	41617.8	47066.7	68835.9	61211.9	54683.1	467643	222098	307287	332343	6.07762	2.60351	3.26843
ENSMUST00000059279	14	13	635.53	0.000732708	Cell Type B Control	405444	ENSMUST00000059279	1.28459e+06	615075	778498	1.07831e+06	939119	3.77247e+06	3.82715e+06	3.73498e+06	3.7782e+06	4.02313	2.00832	3.13507
ENSMUST00000029922	8	8	368.73	0.00074895	Cell Type B Control	32884	ENSMUST00000029922	393634	249222	428233	574296	411346	2.17065e+06	2.22331e+06	1.62562e+06	2.00653e+06	4.87796	2.28628	3.12555
ENSMUST00000097822	42	42	2511.13	0.000779135	Cell Type B Control	571927	ENSMUST00000097822	1.23535e+07	1.34068e+07	1.45136e+07	1.25296e+07	1.32009e+07	2.05006e+07	1.93333e+07	2.34081e+07	2.10806e+07	1.59691	0.675284	3.10839
ENSMUST00000072857	5	5	221.18	0.00107292	Cell Type A Control	74703	ENSMUST00000072857	3.89265e+06	3.35173e+06	3.51618e+06	4.12523e+06	3.72145e+06	2.34647e+06	1.78727e+06	2.10022e+06	2.07799e+06	0.558381	-0.840679	2.96943
ENSMUST00000060835	6	6	389.81	0.00113205	Cell Type A Control	162440	ENSMUST00000060835	960232	1.06534e+06	1.14766e+06	1.01705e+06	1.04757e+06	359571	514012	554265	475949	0.454336	-1.13817	2.94613
ENSMUST00000004389	6	6	351.74	0.00145349	Cell Type B Control	13186	ENSMUST00000004389	1.02828e+06	724904	1.17512e+06	1.20245e+06	1.03269e+06	2.33472e+06	3.05674e+06	3.34413e+06	2.91186e+06	2.81969	1.49554	2.83759
ENSMUST00000112986	2	2	57.55	0.00154575	Cell Type B Control	124951	ENSMUST00000112986	1.10223e+06	1.16299e+06	879733	1.00977e+06	1.03868e+06	1.59441e+06	1.63815e+06	1.76236e+06	1.66497e+06	1.60297	0.680747	2.81086
ENSMUST00000115554	3	2	119.31	0.00187981	Cell Type B Control	68468	ENSMUST00000115554	305469	281078	395136	212466	298537	2.07813e+06	1.07335e+06	976402	1.37596e+06	4.60901	2.20446	2.72588
ENSMUST00000023214	2	2	147.8	0.00195192	Cell Type A Control	56753	ENSMUST00000023214	395499	235606	306341	582176	379906	46795.6	7612.33	19765.7	24724.6	0.0650808	-3.94162	2.70954
ENSMUST00000000828	28	28	2078.65	0.00196234	Cell Type B Control	67510	ENSMUST00000000828	4.99623e+07	6.35075e+07	6.68241e+07	4.74638e+07	5.69394e+07	1.01435e+08	1.12212e+08	1.32513e+08	1.15387e+08	2.02648	1.01898	2.70723
ENSMUST00000032441	3	3	167.16	0.00201885	Cell Type B Control	49976	ENSMUST00000032441	31420.6	17118.7	10648.7	57672.7	29215.2	1.23746e+06	400699	382214	673457	23.0516	4.52679	2.6949
ENSMUST00000090414	13	13	1125.94	0.00238203	Cell Type B Control	54424	ENSMUST00000090414	6.6251e+06	9.78877e+06	8.0323e+06	4.95011e+06	7.34907e+06	1.86568e+07	1.96453e+07	1.85433e+07	1.89485e+07	2.57835	1.36645	2.62305
ENSMUST00000072178	25	25	1675.34	0.00252616	Cell Type B Control	77967	ENSMUST00000072178	9.5413e+06	6.7857e+06	5.87005e+06	9.24947e+06	7.86163e+06	1.90229e+07	1.63762e+07	1.68614e+07	1.74202e+07	2.21585	1.14786	2.59754
ENSMUST00000035540	6	6	288.8	0.0025983	Cell Type A Control	120739	ENSMUST00000035540	922802	1.2404e+06	1.43657e+06	949135	1.13723e+06	322396	419779	538629	426935	0.375418	-1.41343	2.58531
ENSMUST00000031810	4	4	226.36	0.00291968	Cell Type B Control	41416	ENSMUST00000031810	515377	481160	664305	571764	558151	1.12815e+06	1.42917e+06	2.24843e+06	1.60192e+06	2.87004	1.52107	2.53466
ENSMUST00000021347	11	11	723.07	0.00315945	Cell Type A Control	88285	ENSMUST00000021347	8.17728e+06	6.11159e+06	6.92477e+06	8.13955e+06	7.3383e+06	3.79807e+06	4.81386e+06	3.63862e+06	4.08352e+06	0.556466	-0.845634	2.50039
ENSMUST00000091579	18	17	1290.39	0.00325141	Cell Type B Control	41737	ENSMUST00000091579	2.60767e+07	3.87825e+07	3.12958e+07	2.55368e+07	3.04229e+07	6.31967e+07	5.16786e+07	6.65025e+07	6.04592e+07	1.98729	0.990804	2.48793
ENSMUST00000035930	5	5	295.63	0.00333711	Cell Type A Control	74767	ENSMUST00000035930	585737	797441	848581	711611	735842	247510	217548	401377	288812	0.392491	-1.34927	2.47663
ENSMUST00000022808	10	10	659.73	0.00355164	Cell Type A Control	32277	ENSMUST00000022808	5.76859e+07	5.35793e+07	5.34865e+07	6.2846e+07	5.68994e+07	3.18614e+07	3.82632e+07	4.20964e+07	3.7407e+07	0.657423	-0.605107	2.44957
ENSMUST00000001079	5	5	245.73	0.00377212	Cell Type B Control	135465	ENSMUST00000001079	231532	441554	313124	300334	321636	642715	796461	761994	733723	2.28122	1.18981	2.42341
ENSMUST00000028167	15	15	763.61	0.00382308	Cell Type B Control	80902	ENSMUST00000028167	6.1728e+06	6.34155e+06	6.42308e+06	7.81128e+06	6.68717e+06	9.06316e+06	1.10965e+07	1.16167e+07	1.05921e+07	1.58394	0.663522	2.41759
ENSMUST00000080208	2	2	66	0.00389319	Cell Type B Control	103274	ENSMUST00000080208	190827	96522.6	129664	183006	150005	589608	480638	346999	472415	3.14933	1.65504	2.40969
ENSMUST00000020413	13	13	911.74	0.00445675	Cell Type B Control	44824	ENSMUST00000020413	8.35316e+06	4.13211e+06	3.81708e+06	1.01247e+07	6.60677e+06	2.57634e+07	2.45108e+07	2.54588e+07	2.52443e+07	3.82098	1.93394	2.35098
ENSMUST00000035033	14	14	775.13	0.00457618	Cell Type B Control	102384	ENSMUST00000035033	5.91328e+06	8.0212e+06	8.22347e+06	7.63296e+06	7.44773e+06	1.15969e+07	1.14478e+07	1.12977e+07	1.14475e+07	1.53704	0.620155	2.3395
ENSMUST00000167406	5	5	574.89	0.00467617	Cell Type B Control	16724	ENSMUST00000167406	1.34776e+07	1.84277e+07	1.9701e+07	1.40535e+07	1.6415e+07	2.71575e+07	2.95735e+07	3.56086e+07	3.07799e+07	1.87511	0.906975	2.33011
ENSMUST00000220509	3	3	154.21	0.00500363	Cell Type B Control	32824	ENSMUST00000220509	2.36217e+06	1.76603e+06	1.20511e+06	1.87201e+06	1.80133e+06	3.84559e+06	3.80289e+06	5.10756e+06	4.25201e+06	2.36048	1.23908	2.30072
ENSMUST00000025253	17	17	894.58	0.00539516	Cell Type B Control	229063	ENSMUST00000025253	3.89971e+06	4.90099e+06	5.74197e+06	4.62395e+06	4.79165e+06	7.49196e+06	7.51856e+06	9.43221e+06	8.14758e+06	1.70037	0.765847	2.268
ENSMUST00000102718	41	41	2717.78	0.00569625	Cell Type B Control	150698	ENSMUST00000102718	3.02822e+07	3.69673e+07	3.57468e+07	2.892e+07	3.29791e+07	4.66066e+07	4.45466e+07	5.12607e+07	4.74713e+07	1.43944	0.525504	2.24441
ENSMUST00000029663	9	9	672.81	0.00578874	Cell Type B Control	35144	ENSMUST00000029663	6.54656e+06	8.92457e+06	9.03244e+06	7.65934e+06	8.04073e+06	1.14673e+07	1.36183e+07	1.48891e+07	1.33249e+07	1.65718	0.728728	2.23742
ENSMUST00000020112	4	4	194.68	0.0059947	Cell Type B Control	161838	ENSMUST00000020112	192253	153457	177920	72238	148967	498730	680505	424926	534721	3.58952	1.84379	2.22223
ENSMUST00000044505	8	8	556.77	0.00680265	Cell Type B Control	80240	ENSMUST00000044505	2.26993e+06	3.44384e+06	3.6936e+06	1.73502e+06	2.7856e+06	6.4365e+06	6.84967e+06	9.29626e+06	7.52748e+06	2.70229	1.43418	2.16732
ENSMUST00000093100	29	29	1909.31	0.00688675	Cell Type B Control	69660	ENSMUST00000093100	2.9969e+07	4.45895e+07	4.34615e+07	3.20782e+07	3.75246e+07	6.09886e+07	6.32087e+07	7.35965e+07	6.59313e+07	1.75702	0.813127	2.16199
ENSMUST00000020954	6	6	306.19	0.00718624	Cell Type A Control	87639	ENSMUST00000020954	9.00541e+06	7.40113e+06	7.44879e+06	9.00545e+06	8.2152e+06	2.17465e+06	3.89684e+06	4.60019e+06	3.55722e+06	0.433005	-1.20754	2.1435
ENSMUST00000238603	10	10	606.8	0.00751836	Cell Type A Control	39093	ENSMUST00000238603	2.50458e+07	1.61459e+07	1.83133e+07	2.8441e+07	2.19865e+07	1.03226e+07	8.70554e+06	1.17195e+07	1.02492e+07	0.466159	-1.1011	2.12388
ENSMUST00000027833	33	30	1979.16	0.00754716	Cell Type B Control	139321	ENSMUST00000027833	1.47943e+07	1.71099e+07	1.69543e+07	1.47064e+07	1.58912e+07	2.26154e+07	1.92951e+07	2.43658e+07	2.20921e+07	1.39021	0.475301	2.12222
ENSMUST00000035177	2	2	65.46	0.00773174	Cell Type A Control	39085	ENSMUST00000035177	424154	343479	316932	478228	390698	23884.6	48488.3	144729	72367.1	0.185225	-2.43265	2.11172
ENSMUST00000027947	7	7	482.8	0.00808707	Cell Type A Control	59773	ENSMUST00000027947	2.49764e+06	2.13624e+06	2.27211e+06	3.20804e+06	2.52851e+06	1.60747e+06	1.61886e+06	1.53253e+06	1.58629e+06	0.627362	-0.672631	2.09221
ENSMUST00000023759	4	4	246.86	0.00808942	Cell Type A Control	58208	ENSMUST00000023759	1.6217e+06	1.26571e+06	1.23337e+06	2.00001e+06	1.5302e+06	421100	700636	787463	636400	0.415894	-1.26571	2.09208
ENSMUST00000026387	11	11	474.93	0.0100064	Cell Type B Control	28762	ENSMUST00000026387	8.63786e+06	1.15616e+07	1.22807e+07	8.97834e+06	1.03646e+07	1.61895e+07	1.47785e+07	1.75594e+07	1.61758e+07	1.56067	0.64217	1.99972
ENSMUST00000003207	3	3	151.12	0.0102194	Cell Type B Control	87971	ENSMUST00000003207	97785.4	55063.1	43392.7	9499.37	51435.2	414362	364512	470806	416560	8.09874	3.0177	1.99057
ENSMUST00000033342	10	10	787.76	0.0103003	Cell Type B Control	37960	ENSMUST00000033342	5.41538e+06	8.14775e+06	8.53566e+06	5.85731e+06	6.98902e+06	1.23179e+07	1.14205e+07	1.18675e+07	1.18686e+07	1.69818	0.76399	1.98715
ENSMUST00000025215	11	11	782.11	0.0104195	Cell Type B Control	52397	ENSMUST00000025215	6.65325e+06	3.34868e+06	3.07641e+06	5.53817e+06	4.65413e+06	1.10628e+07	1.20206e+07	9.90472e+06	1.0996e+07	2.36264	1.2404	1.98215
ENSMUST00000079009	14	14	903.61	0.0111675	Cell Type A Control	155882	ENSMUST00000079009	4.61587e+06	7.15522e+06	7.91202e+06	4.67967e+06	6.0907e+06	2.44587e+06	2.75779e+06	3.43606e+06	2.87991e+06	0.472837	-1.08059	1.95205
ENSMUST00000037850	5	5	260.93	0.0118721	Cell Type B Control	58435	ENSMUST00000037850	897838	1.21086e+06	1.35604e+06	1.62881e+06	1.27339e+06	2.51587e+06	2.09697e+06	2.19375e+06	2.26886e+06	1.78176	0.8333	1.92547
ENSMUST00000018337	9	9	353.17	0.0123655	Cell Type A Control	60539	ENSMUST00000018337	3.57098e+06	3.10873e+06	2.87907e+06	3.08026e+06	3.15976e+06	2.64472e+06	2.19908e+06	2.0199e+06	2.2879e+06	0.724074	-0.465792	1.90779
ENSMUST00000065425	15	15	872.85	0.013426	Cell Type B Control	71428	ENSMUST00000065425	6.32767e+06	7.43393e+06	7.1374e+06	4.86149e+06	6.44012e+06	8.89329e+06	1.31508e+07	1.4372e+07	1.21387e+07	1.88486	0.914455	1.87205
ENSMUST00000084214	41	41	2421.36	0.013601	Cell Type B Control	174610	ENSMUST00000084214	2.05125e+07	2.84929e+07	2.95681e+07	2.21958e+07	2.51923e+07	4.55188e+07	3.66918e+07	3.65714e+07	3.9594e+07	1.57167	0.652297	1.86643
ENSMUST00000082262	6	5	295.7	0.0152503	Cell Type A Control	111492	ENSMUST00000082262	2.58052e+06	1.45458e+06	1.84325e+06	3.02592e+06	2.22607e+06	863049	794366	1.2342e+06	963873	0.432994	-1.20758	1.81672
ENSMUST00000040876	9	9	551.5	0.0168806	Cell Type B Control	82486	ENSMUST00000040876	2.33471e+06	3.95456e+06	5.0453e+06	2.54693e+06	3.47037e+06	7.31098e+06	6.34698e+06	8.859e+06	7.50565e+06	2.16278	1.11289	1.77261
ENSMUST00000161286	11	11	764.71	0.017279	Cell Type A Control	33646	ENSMUST00000161286	4.65559e+07	4.17876e+07	4.19928e+07	4.80686e+07	4.46012e+07	1.99676e+07	2.9591e+07	3.41216e+07	2.78934e+07	0.625396	-0.677158	1.76248
ENSMUST00000165242	13	12	731.6	0.0176228	Cell Type B Control	63498	ENSMUST00000165242	5.03932e+06	6.3194e+06	6.18911e+06	4.94087e+06	5.62217e+06	7.26519e+06	7.81798e+06	1.01111e+07	8.39809e+06	1.49374	0.578933	1.75393
ENSMUST00000079659	22	22	1169.99	0.0187843	Cell Type B Control	118188	ENSMUST00000079659	1.73105e+07	2.17847e+07	2.52847e+07	2.24323e+07	2.1703e+07	3.0717e+07	2.79478e+07	3.33136e+07	3.06594e+07	1.41268	0.498434	1.72621
ENSMUST00000146993	8	8	380.58	0.0196564	Cell Type A Control	138643	ENSMUST00000146993	2.71588e+06	1.34861e+06	1.19333e+06	2.64449e+06	1.97558e+06	807738	447842	174530	476703	0.241298	-2.05111	1.7065
ENSMUST00000022954	10	7	613.77	0.0202664	Cell Type A Control	38784	ENSMUST00000022954	1.4756e+07	1.32428e+07	1.40553e+07	1.63124e+07	1.45916e+07	8.42928e+06	1.07953e+07	1.20504e+07	1.0425e+07	0.714448	-0.485098	1.69322
ENSMUST00000089759	2	2	77.38	0.0205273	Cell Type A Control	38274	ENSMUST00000089759	480694	222322	310097	605777	404723	157116	137965	166286	153789	0.379986	-1.39598	1.68767
ENSMUST00000020755	3	3	213.21	0.0220257	Cell Type A Control	93875	ENSMUST00000020755	388874	821318	924368	461789	649087	269252	286958	161199	239136	0.368419	-1.44058	1.65707
ENSMUST00000098609	3	3	144.65	0.0229127	Cell Type B Control	73012	ENSMUST00000098609	13658.6	154015	196806	57939.8	105605	1.31151e+06	584646	640776	845645	8.00762	3.00137	1.63992
ENSMUST00000041463	2	2	77.01	0.0270077	Cell Type B Control	27708	ENSMUST00000041463	132465	137416	222703	109008	150398	241431	272491	477085	330336	2.19641	1.13515	1.56851
ENSMUST00000015239	6	6	341.7	0.0285314	Cell Type B Control	64605	ENSMUST00000015239	1.48028e+06	2.2606e+06	2.59313e+06	1.39024e+06	1.93106e+06	2.82892e+06	3.60718e+06	4.55213e+06	3.66274e+06	1.89675	0.923529	1.54468
ENSMUST00000031617	17	16	1116.3	0.0309615	Cell Type B Control	33489	ENSMUST00000031617	3.85316e+07	3.52813e+07	3.52704e+07	4.04255e+07	3.73772e+07	5.79539e+07	4.05461e+07	5.35201e+07	5.06734e+07	1.35573	0.439069	1.50918
ENSMUST00000026009	16	16	1282.9	0.0331244	Cell Type B Control	20474	ENSMUST00000026009	6.12397e+07	8.31232e+07	9.02279e+07	5.26315e+07	7.18056e+07	1.01103e+08	1.10799e+08	1.20554e+08	1.10818e+08	1.54331	0.62603	1.47985
ENSMUST00000008477	7	7	352.97	0.0332348	Cell Type A Control	25307	ENSMUST00000008477	9.77941e+06	8.09408e+06	8.24928e+06	9.81102e+06	8.98345e+06	6.94658e+06	6.9898e+06	4.53663e+06	6.15767e+06	0.685446	-0.544885	1.47841
ENSMUST00000031977	8	8	432.48	0.0350648	Cell Type A Control	46946	ENSMUST00000031977	1.64319e+07	9.20485e+06	9.53392e+06	1.43533e+07	1.2381e+07	7.08625e+06	7.1294e+06	7.67471e+06	7.29679e+06	0.589353	-0.762795	1.45513
ENSMUST00000102973	3	3	179.16	0.0355137	Cell Type A Control	98063	ENSMUST00000102973	856847	508999	727927	842875	734162	190970	513998	344079	349682	0.476301	-1.07005	1.4496
ENSMUST00000027252	20	20	1267.85	0.0414194	Cell Type B Control	137532	ENSMUST00000027252	8.65994e+06	8.61978e+06	9.69861e+06	8.54381e+06	8.88053e+06	1.28622e+07	1.00008e+07	1.01603e+07	1.10077e+07	1.23954	0.309799	1.3828
ENSMUST00000071972	9	9	436.01	0.042874	Cell Type B Control	144843	ENSMUST00000071972	2.18664e+06	3.47333e+06	2.80073e+06	1.91414e+06	2.59371e+06	4.11915e+06	3.85953e+06	3.67049e+06	3.88306e+06	1.49711	0.582176	1.36781
ENSMUST00000092143	3	3	158.29	0.0442307	Cell Type B Control	20212	ENSMUST00000092143	238892	775562	820944	458702	573525	1.07317e+06	1.29536e+06	2.76874e+06	1.71242e+06	2.98579	1.57811	1.35428
ENSMUST00000044217	6	5	204.47	0.044878	Cell Type A Control	782238	ENSMUST00000044217	7.72354e+06	4.87178e+06	5.18096e+06	6.4928e+06	6.06727e+06	4.14375e+06	4.03617e+06	4.5373e+06	4.23907e+06	0.698679	-0.517299	1.34797
ENSMUST00000026292	10	10	533.61	0.0450586	Cell Type B Control	482389	ENSMUST00000026292	1.24114e+06	1.23614e+06	1.50549e+06	1.38729e+06	1.34252e+06	1.47822e+06	2.18689e+06	1.78159e+06	1.81556e+06	1.35236	0.435477	1.34622
ENSMUST00000101195	6	6	275.05	0.0521211	Cell Type A Control	131924	ENSMUST00000101195	1.24083e+06	1.61412e+06	1.31931e+06	1.09488e+06	1.31729e+06	819285	1.07405e+06	1.02321e+06	972180	0.738018	-0.438272	1.28299
ENSMUST00000023694	9	8	590.13	0.0527278	Cell Type B Control	33169	ENSMUST00000023694	8.90605e+06	1.4579e+07	1.34066e+07	8.20034e+06	1.1273e+07	1.72553e+07	1.58319e+07	1.77264e+07	1.69379e+07	1.50252	0.58738	1.27796
ENSMUST00000011895	2	2	70.91	0.0544366	Cell Type B Control	288646	ENSMUST00000011895	83200.4	161430	148859	188841	145583	218799	246050	252302	239051	1.64203	0.715477	1.26411
ENSMUST00000042373	36	36	3092.68	0.0589755	Cell Type B Control	70903	ENSMUST00000042373	5.63101e+07	1.14639e+08	1.27584e+08	6.69287e+07	9.13655e+07	1.51615e+08	1.44122e+08	1.69075e+08	1.54938e+08	1.6958	0.761966	1.22933
ENSMUST00000047242	5	5	246.39	0.0593156	Cell Type B Control	70995	ENSMUST00000047242	489749	752014	611275	406774	564953	751083	789652	1.00099e+06	847242	1.49967	0.584642	1.22683
ENSMUST00000099858	12	12	686.87	0.0650942	Cell Type A Control	80700	ENSMUST00000099858	4.89929e+06	4.36512e+06	5.31045e+06	4.90075e+06	4.8689e+06	4.34751e+06	4.04513e+06	4.46024e+06	4.28429e+06	0.87993	-0.18454	1.18646
ENSMUST00000011934	3	2	92.46	0.0660545	Cell Type B Control	2990002	ENSMUST00000011934	760100	1.29618e+06	513357	578472	787027	3.94668e+06	2.56284e+06	889040	2.46618e+06	3.13354	1.6478	1.1801
ENSMUST00000036030	6	6	500.46	0.0708576	Cell Type A Control	21262	ENSMUST00000036030	8.89976e+06	8.21322e+06	8.78065e+06	1.05788e+07	9.11811e+06	7.44043e+06	5.90409e+06	8.27843e+06	7.20765e+06	0.790476	-0.339206	1.14961
ENSMUST00000097541	2	2	69.63	0.0736419	Cell Type A Control	66782	ENSMUST00000097541	140577	50975	60865.1	215872	117072	42786.2	4237.57	35144	27389.3	0.233951	-2.09572	1.13288
ENSMUST00000060043	8	8	505.53	0.0741256	Cell Type B Control	250779	ENSMUST00000060043	1.76504e+06	3.2234e+06	2.57942e+06	1.47699e+06	2.26121e+06	3.28121e+06	3.18633e+06	4.58453e+06	3.68402e+06	1.62923	0.704186	1.13003
ENSMUST00000053959	4	4	153.6	0.0765349	Cell Type A Control	99598	ENSMUST00000053959	452672	609671	673273	425527	540286	506385	201735	238570	315563	0.584067	-0.775794	1.11614
ENSMUST00000132121	2	2	116.26	0.078767	Cell Type B Control	19588	ENSMUST00000132121	490653	252381	196380	332090	317876	474458	495646	538602	502902	1.58207	0.661813	1.10366
ENSMUST00000161596	3	3	146.21	0.0808815	Cell Type A Control	40836	ENSMUST00000161596	1.40136e+06	498688	627172	1.14935e+06	919141	276053	438523	549724	421433	0.458508	-1.12498	1.09215
ENSMUST00000042517	6	6	397.83	0.0828707	Cell Type A Control	73195	ENSMUST00000042517	1.70103e+06	2.47154e+06	3.17987e+06	2.33614e+06	2.42214e+06	497113	1.32711e+06	1.87031e+06	1.23151e+06	0.508438	-0.975855	1.0816
ENSMUST00000025649	37	37	2465.41	0.0839546	Cell Type A Control	126772	ENSMUST00000025649	4.97629e+07	5.85043e+07	7.20894e+07	6.74897e+07	6.19616e+07	4.10935e+07	4.75334e+07	5.46926e+07	4.77732e+07	0.771013	-0.375172	1.07596
ENSMUST00000102715	14	14	916.5	0.0881708	Cell Type B Control	60282	ENSMUST00000102715	5.05277e+06	8.16349e+06	8.41972e+06	5.25951e+06	6.72387e+06	7.10753e+06	1.28007e+07	1.51526e+07	1.16869e+07	1.73813	0.797533	1.05468
ENSMUST00000056758	2	2	91.96	0.0893813	Cell Type B Control	58606	ENSMUST00000056758	287459	335759	632307	1.03932e+06	573710	1.31941e+06	870448	1.1016e+06	1.09715e+06	1.91238	0.93537	1.04875
ENSMUST00000001148	21	21	1916.92	0.0900671	Cell Type B Control	39269	ENSMUST00000001148	6.1256e+07	1.0291e+08	1.10015e+08	7.56765e+07	8.74644e+07	1.14949e+08	1.11749e+08	1.45158e+08	1.23952e+08	1.41717	0.503012	1.04543
ENSMUST00000026560	17	17	1163.97	0.0963107	Cell Type B Control	42782	ENSMUST00000026560	1.72039e+07	2.19295e+07	2.45084e+07	1.9654e+07	2.0824e+07	2.24317e+07	2.64597e+07	3.42116e+07	2.7701e+07	1.33025	0.411694	1.01633
ENSMUST00000061287	2	2	91.44	0.0972652	Cell Type B Control	112606	ENSMUST00000061287	383118	344252	331609	369443	357105	381167	385942	472494	413201	1.15708	0.210493	1.01204
ENSMUST00000030432	6	6	347.11	0.0996874	Cell Type A Control	34217	ENSMUST00000030432	2.38805e+06	1.29179e+06	1.64618e+06	2.14357e+06	1.8674e+06	558762	678832	1.8671e+06	1.0349e+06	0.554193	-0.85154	1.00136
ENSMUST00000144326	11	10	675.16	0.101583	Cell Type B Control	75720	ENSMUST00000144326	2.0505e+06	2.72671e+06	3.03962e+06	2.30105e+06	2.52947e+06	2.55832e+06	3.90071e+06	4.51619e+06	3.65841e+06	1.44631	0.53238	0.993179
ENSMUST00000120240	3	3	293.05	0.107866	Cell Type A Control	28636	ENSMUST00000120240	7.08803e+06	6.19552e+06	7.06522e+06	9.52891e+06	7.46942e+06	6.84754e+06	4.82205e+06	5.39958e+06	5.68973e+06	0.761736	-0.392637	0.967117
ENSMUST00000023882	19	19	1169.43	0.12866	Cell Type A Control	142530	ENSMUST00000023882	9.81014e+06	8.37797e+06	1.04591e+07	1.09201e+07	9.89183e+06	7.51506e+06	7.40039e+06	9.79773e+06	8.23773e+06	0.83278	-0.263992	0.890556
ENSMUST00000026094	6	6	382.16	0.131498	Cell Type A Control	22805	ENSMUST00000026094	3.27307e+07	2.75006e+07	3.17983e+07	5.17545e+07	3.5946e+07	2.45055e+07	2.34915e+07	2.92197e+07	2.57389e+07	0.716043	-0.481882	0.88108
ENSMUST00000045376	8	8	531.51	0.132622	Cell Type B Control	40123	ENSMUST00000045376	2.16639e+06	2.9455e+06	3.58498e+06	2.38544e+06	2.77058e+06	3.04462e+06	3.6748e+06	4.01178e+06	3.57707e+06	1.29109	0.368591	0.877385
ENSMUST00000049484	3	3	118.92	0.138588	Cell Type B Control	42452	ENSMUST00000049484	36945.2	23786.5	291148	84268.5	109037	195503	235799	215979	215761	1.97878	0.984614	0.858274
ENSMUST00000160285	3	3	169.84	0.141785	Cell Type B Control	105451	ENSMUST00000160285	278757	440838	394941	138401	313234	363083	583099	681263	542482	1.73187	0.792332	0.848371
ENSMUST00000026168	2	2	135.83	0.146891	Cell Type A Control	108154	ENSMUST00000026168	103526	163581	218900	128152	153540	94818.6	128453	87818	103697	0.675372	-0.566245	0.833004
ENSMUST00000170651	40	38	2178.63	0.148621	Cell Type B Control	540892	ENSMUST00000170651	6.96267e+06	1.16033e+07	1.39353e+07	7.59827e+06	1.00249e+07	1.21493e+07	1.32227e+07	1.61767e+07	1.38496e+07	1.38152	0.466253	0.827918
ENSMUST00000020705	2	2	90.71	0.153439	Cell Type A Control	67753	ENSMUST00000020705	271355	175817	188279	420897	264087	173289	119361	192315	161655	0.612128	-0.708096	0.814065
ENSMUST00000111564	5	2	202.61	0.155074	Cell Type B Control	147152	ENSMUST00000111564	17972.5	23257.8	13810.4	0	13760.2	160958	295595	280043	245532	17.8437	4.15734	0.809462
ENSMUST00000021372	3	3	113.7	0.156687	Cell Type B Control	23260	ENSMUST00000021372	589438	440779	456128	738063	556102	722134	585605	993220	766986	1.37922	0.463852	0.804966
ENSMUST00000039608	2	2	91.44	0.166474	Cell Type A Control	75800	ENSMUST00000039608	256291	122698	131064	130912	160241	5292.88	82921.4	125872	71362.2	0.445343	-1.16701	0.778652
ENSMUST00000005705	52	52	3884.27	0.192197	Cell Type B Control	88791	ENSMUST00000005705	1.50765e+08	2.56453e+08	2.68035e+08	1.61322e+08	2.09144e+08	2.37086e+08	2.70238e+08	3.01522e+08	2.69615e+08	1.28914	0.366408	0.716254
ENSMUST00000042780	4	4	174.77	0.194161	Cell Type B Control	125147	ENSMUST00000042780	375556	204716	267304	55835.8	225853	564991	665712	217685	482796	2.13766	1.09603	0.711837
ENSMUST00000144673	2	2	190.21	0.194795	Cell Type A Control	64276	ENSMUST00000144673	820542	222423	381327	857428	570430	529576	98813.2	185363	271251	0.475519	-1.07242	0.710422
ENSMUST00000024717	5	5	291.01	0.200233	Cell Type B Control	91779	ENSMUST00000024717	1.19513e+06	1.47297e+06	1.44518e+06	1.02611e+06	1.28485e+06	4.01795e+06	1.37769e+06	1.45277e+06	2.2828e+06	1.77671	0.829208	0.698465
ENSMUST00000048028	2	2	110.22	0.210437	Cell Type B Control	141077	ENSMUST00000048028	175307	29211.1	59361.1	90949.7	88707.3	425386	1029.86	0	142139	1.60233	0.680175	0.676879
ENSMUST00000042471	5	5	265.07	0.211845	Cell Type B Control	108769	ENSMUST00000042471	459702	381053	383675	408598	408257	308293	896842	887356	697497	1.70848	0.772709	0.673981
ENSMUST00000106228	4	4	278.91	0.213441	Cell Type A Control	37139	ENSMUST00000106228	2.92215e+06	3.05941e+06	2.25298e+06	2.47048e+06	2.67625e+06	1.64011e+06	2.34437e+06	2.61806e+06	2.20085e+06	0.822361	-0.282156	0.670722
ENSMUST00000007747	9	8	397.99	0.218658	Cell Type A Control	71105	ENSMUST00000007747	1.76897e+06	2.40036e+06	1.67939e+06	2.25294e+06	2.02541e+06	1.64165e+06	1.34468e+06	2.00015e+06	1.66216e+06	0.820653	-0.285156	0.660235
ENSMUST00000070330	13	13	717.85	0.2341	Cell Type B Control	96743	ENSMUST00000070330	5.17423e+06	6.75426e+06	8.16138e+06	6.96691e+06	6.7642e+06	5.37816e+06	1.12891e+07	1.59389e+07	1.08687e+07	1.6068	0.684189	0.630598
ENSMUST00000022348	5	5	296.73	0.239691	Cell Type B Control	123019	ENSMUST00000022348	473064	1.10708e+06	714275	334413	657207	1.09956e+06	1.06916e+06	678425	949046	1.44406	0.53013	0.620349
ENSMUST00000028052	3	3	127.59	0.25342	Cell Type A Control	42727	ENSMUST00000028052	360850	604959	671334	382005	504787	4155.64	659125	258307	307196	0.608566	-0.716515	0.59616
ENSMUST00000085385	2	2	60.64	0.263361	Cell Type A Control	229244	ENSMUST00000085385	258758	468243	410771	180358	329532	271689	205674	183305	220223	0.668288	-0.581458	0.579449
ENSMUST00000031445	2	2	65.02	0.273268	Cell Type A Control	75152	ENSMUST00000031445	234535	285523	333607	313903	291892	11491.6	245422	315283	190732	0.653434	-0.613887	0.563412
ENSMUST00000115027	2	2	108.73	0.291919	Cell Type A Control	89220	ENSMUST00000115027	2.85543e+06	2.23703e+06	2.42085e+06	3.09983e+06	2.65328e+06	363692	2.17577e+06	3.13862e+06	1.8927e+06	0.713341	-0.487336	0.534738
ENSMUST00000039832	2	2	62.87	0.298165	Cell Type A Control	34308	ENSMUST00000039832	609452	278423	209320	928018	506303	546078	167041	121052	278057	0.54919	-0.864622	0.525543
ENSMUST00000019925	2	2	109.02	0.304341	Cell Type B Control	18595	ENSMUST00000019925	387516	495638	633628	622001	534696	487502	686127	818790	664140	1.24209	0.312768	0.516639
ENSMUST00000112294	2	2	83.4	0.340218	Cell Type A Control	19141	ENSMUST00000112294	659803	620033	527310	672169	619829	295957	572169	685170	517766	0.835336	-0.259571	0.468243
ENSMUST00000164539	13	13	562.48	0.346699	Cell Type B Control	262937	ENSMUST00000164539	4.78963e+06	4.59832e+06	4.79854e+06	6.18928e+06	5.09395e+06	5.23724e+06	5.03721e+06	7.26076e+06	5.84507e+06	1.14745	0.198437	0.460047
ENSMUST00000063071	11	11	675.13	0.352272	Cell Type B Control	107123	ENSMUST00000063071	2.97504e+06	4.94446e+06	5.11873e+06	3.14039e+06	4.04466e+06	3.55728e+06	5.50559e+06	6.03117e+06	5.03135e+06	1.24395	0.314927	0.453121
ENSMUST00000101044	3	3	166.27	0.407765	Cell Type A Control	136696	ENSMUST00000101044	1.07114e+06	942855	1.71226e+06	1.60513e+06	1.33285e+06	963325	899477	1.40624e+06	1.08968e+06	0.81756	-0.290604	0.38959
ENSMUST00000028517	11	11	746.53	0.410024	Cell Type B Control	44701	ENSMUST00000028517	8.13402e+06	1.16922e+07	1.29754e+07	8.73874e+06	1.03851e+07	8.64986e+06	1.32864e+07	1.58057e+07	1.25807e+07	1.21142	0.276694	0.38719
ENSMUST00000035010	11	11	730.04	0.420109	Cell Type A Control	93255	ENSMUST00000035010	8.17704e+06	6.02995e+06	5.15544e+06	8.52154e+06	6.97099e+06	5.70387e+06	6.39093e+06	5.92966e+06	6.00815e+06	0.861879	-0.214442	0.376638
ENSMUST00000085375	3	3	181.36	0.465414	Cell Type B Control	32188	ENSMUST00000085375	2.75084e+06	3.28415e+06	3.49899e+06	2.52067e+06	3.01366e+06	2.802e+06	3.29428e+06	3.81031e+06	3.3022e+06	1.09574	0.13191	0.332161
ENSMUST00000032057	14	14	719.45	0.49431	Cell Type B Control	78489	ENSMUST00000032057	5.26134e+06	4.9606e+06	5.41166e+06	6.17409e+06	5.45192e+06	4.59021e+06	6.14119e+06	7.70199e+06	6.14447e+06	1.12703	0.172522	0.306
ENSMUST00000183703	2	2	64.81	0.536148	Cell Type B Control	128252	ENSMUST00000183703	2.5351e+06	2.05835e+06	2.41363e+06	1.76425e+06	2.19283e+06	4.48204e+06	1.85108e+06	349364	2.2275e+06	1.01581	0.0226271	0.270715
ENSMUST00000099537	10	10	464.56	0.541074	Cell Type A Control	172443	ENSMUST00000099537	6.23658e+06	5.36654e+06	5.40511e+06	5.79381e+06	5.70051e+06	7.99001e+06	4.26216e+06	3.59869e+06	5.28362e+06	0.926868	-0.109564	0.266744
ENSMUST00000069107	2	2	57.79	0.545388	Cell Type B Control	41249	ENSMUST00000069107	94849	109825	88774.9	120902	103588	71200.5	230958	117801	139986	1.35138	0.434431	0.263295
ENSMUST00000121964	6	6	291.74	0.550873	Cell Type B Control	148515	ENSMUST00000121964	485607	1.05518e+06	1.30743e+06	692020	885060	489447	1.50807e+06	1.71355e+06	1.23702e+06	1.39767	0.483023	0.258948
ENSMUST00000025377	2	2	183.61	0.552799	Cell Type B Control	51984	ENSMUST00000025377	1.48981e+06	1.59651e+06	1.81371e+06	1.04628e+06	1.48658e+06	1.31934e+06	1.63574e+06	1.98841e+06	1.64783e+06	1.10847	0.148568	0.257432
ENSMUST00000080517	2	2	81.19	0.580317	Cell Type A Control	23832	ENSMUST00000080517	296713	540497	564634	303636	426370	277453	415647	387195	360098	0.844568	-0.243715	0.236335
ENSMUST00000088169	4	4	395.1	0.593706	Cell Type B Control	25412	ENSMUST00000088169	8.91154e+06	7.23295e+06	8.47152e+06	1.15019e+07	9.02948e+06	8.66591e+06	8.41647e+06	1.26864e+07	9.92294e+06	1.09895	0.136125	0.226428
ENSMUST00000026991	11	11	962.43	0.602894	Cell Type B Control	50199	ENSMUST00000026991	1.40473e+07	9.99478e+06	1.04034e+07	1.5074e+07	1.23799e+07	1.42436e+07	1.19306e+07	1.32131e+07	1.31291e+07	1.06052	0.0847715	0.219759
ENSMUST00000072186	12	12	460.91	0.60319	Cell Type B Control	73658	ENSMUST00000072186	2.01435e+07	1.72408e+07	1.84346e+07	2.46078e+07	2.01067e+07	2.26446e+07	1.73411e+07	2.49587e+07	2.16481e+07	1.07666	0.106569	0.219546
ENSMUST00000102815	9	8	421.96	0.607021	Cell Type B Control	123974	ENSMUST00000102815	4.14601e+06	3.69902e+06	1.48292e+06	1.3026e+06	2.65764e+06	2.71502e+06	3.04216e+06	2.76821e+06	2.8418e+06	1.06929	0.0966567	0.216796
ENSMUST00000033139	5	5	280.05	0.612106	Cell Type B Control	59108	ENSMUST00000033139	2.98748e+06	3.55782e+06	3.59352e+06	2.53386e+06	3.16817e+06	2.53129e+06	4.06052e+06	3.88984e+06	3.49389e+06	1.10281	0.141182	0.213173
ENSMUST00000027040	7	7	366.93	0.616929	Cell Type B Control	182234	ENSMUST00000027040	861887	1.45967e+06	1.65462e+06	1.08727e+06	1.26586e+06	1.22115e+06	1.68011e+06	1.22819e+06	1.37648e+06	1.08739	0.120869	0.209765
ENSMUST00000113489	13	13	895.18	0.629907	Cell Type A Control	61717	ENSMUST00000113489	2.39213e+07	2.40284e+07	2.3181e+07	2.27413e+07	2.3468e+07	1.84232e+07	2.30418e+07	2.64945e+07	2.26532e+07	0.965279	-0.0509823	0.200723
ENSMUST00000027475	2	2	104.51	0.655817	Cell Type B Control	149102	ENSMUST00000027475	550098	414006	536765	263424	441073	349057	477605	652676	493113	1.11798	0.1609	0.183217
ENSMUST00000025846	12	12	695.87	0.670485	Cell Type A Control	94593	ENSMUST00000025846	4.84821e+06	6.12816e+06	6.38423e+06	4.45812e+06	5.45468e+06	5.21353e+06	5.17919e+06	5.04312e+06	5.14528e+06	0.943278	-0.0842451	0.173611
ENSMUST00000061047	3	2	103.47	0.693057	Cell Type B Control	182252	ENSMUST00000061047	31475.2	119348	128128	68305.2	86814.2	36053.8	122143	203138	120445	1.38739	0.472371	0.159231
ENSMUST00000048417	82	82	5010.73	0.702544	Cell Type B Control	492029	ENSMUST00000048417	2.661e+07	4.38853e+07	5.00038e+07	2.85228e+07	3.72555e+07	4.07276e+07	3.4344e+07	4.1838e+07	3.89699e+07	1.04602	0.0649064	0.153326
ENSMUST00000073418	40	38	1903.87	0.707391	Cell Type A Control	533861	ENSMUST00000073418	9.18523e+06	7.84418e+06	8.67699e+06	1.00174e+07	8.93096e+06	1.1583e+07	6.32197e+06	7.94697e+06	8.6173e+06	0.96488	-0.051579	0.15034
ENSMUST00000004316	7	6	334.07	0.723787	Cell Type A Control	61251	ENSMUST00000004316	8.71998e+06	9.50877e+06	1.02199e+07	9.92533e+06	9.5935e+06	1.03886e+07	9.23205e+06	8.53313e+06	9.38458e+06	0.978223	-0.0317642	0.14039
ENSMUST00000094964	10	9	428.97	0.765003	Cell Type B Control	460608	ENSMUST00000094964	3.62709e+06	3.91628e+06	3.50891e+06	3.83695e+06	3.72231e+06	4.00239e+06	1.94004e+06	5.2289e+06	3.72378e+06	1.00039	0.000568633	0.116337
ENSMUST00000031838	3	3	187.13	0.78516	Cell Type A Control	63535	ENSMUST00000031838	839239	1.01398e+06	1.0839e+06	568697	876455	511262	834050	1.15321e+06	832841	0.950238	-0.0736392	0.105042
ENSMUST00000238061	12	11	703.38	0.826277	Cell Type B Control	29219	ENSMUST00000238061	1.25849e+07	1.37744e+07	1.41364e+07	1.22153e+07	1.31778e+07	1.10687e+07	1.27648e+07	1.75154e+07	1.37829e+07	1.04592	0.0647771	0.0828744
ENSMUST00000114077	7	7	404.46	0.887989	Cell Type A Control	41574	ENSMUST00000114077	4.06006e+07	1.91152e+07	1.73551e+07	2.35711e+07	2.51605e+07	2.31295e+07	2.31391e+07	2.76847e+07	2.46511e+07	0.979753	-0.0295103	0.0515925
ENSMUST00000057288	29	29	2723.18	0.893711	Cell Type A Control	48102	ENSMUST00000057288	4.09831e+08	2.43802e+08	2.61065e+08	4.24911e+08	3.34902e+08	3.17889e+08	2.8848e+08	3.45519e+08	3.17296e+08	0.947428	-0.0779117	0.0488027
ENSMUST00000102727	6	6	355.36	0.902132	Cell Type B Control	75241	ENSMUST00000102727	5.22158e+06	4.03622e+06	1.95534e+06	1.7388e+06	3.23799e+06	8.22037e+06	3.79659e+06	998311	4.33843e+06	1.33985	0.422075	0.0447302
ENSMUST00000156187	8	8	369.67	0.938185	Cell Type B Control	175660	ENSMUST00000156187	1.07545e+07	1.30632e+07	1.37858e+07	1.03201e+07	1.19809e+07	3.53462e+06	1.50667e+07	2.78051e+07	1.54688e+07	1.29112	0.368625	0.0277114

## Sheet: post-meiotic vs. meiotic, cKO
Differentially expressed proteins: post-meiotic vs. meiotic Ago2 cKO male germ cells
							Normalized abundance
							Cell Type A (meiotic) KO					Cell Type B (post-meiotic) KO
Accession	Peptide count	Unique peptides	Confidence score	Anova (p)	Mass	Description	QEp21-2801_Lesch_KOP1	QEp21-2806_Lesch_KOP2	QEp21-3071_Lesch_KOP1	QEp21-3076_Lesch_KOP2	Average	QEp21-0246_Lesch_A2KORSP1	QEp21-0261_Lesch_A2KORSP2	QEp21-0266_Lesch_A2KORSP3r	Average	Mean Ratio (CellTypeBKO/CellTypeAKO)	log2(mean of ratio[CellTypeBControl/CellTypeAControl])	minus log (Anova p)
ENSMUST00000238603	9	9	643.2	3.48984e-07	39093	ENSMUST00000238603	3.60406e+07	3.82469e+07	3.6013e+07	3.76462e+07	3.69867e+07	1.53146e+07	1.42785e+07	1.51707e+07	1.49212e+07	0.403422	-1.30964	6.45719
ENSMUST00000030432	6	6	380.34	1.19508e-06	34217	ENSMUST00000030432	2.83473e+06	3.14203e+06	2.84328e+06	3.00746e+06	2.95688e+06	1.07364e+06	1.10928e+06	1.16629e+06	1.1164e+06	0.377561	-1.40522	5.9226
ENSMUST00000035930	2	2	95.26	1.88695e-06	74767	ENSMUST00000035930	581906	591506	795183	564154	633187	57424.6	59165	56550.3	57713.3	0.0911473	-3.45566	5.72424
ENSMUST00000159993	5	5	322.24	7.375e-06	159844	ENSMUST00000159993	898273	775113	870469	835933	844947	6.09759e+06	5.19504e+06	4.2564e+06	5.18301e+06	6.13413	2.61686	5.13224
ENSMUST00000021802	10	10	589.49	3.90865e-05	52829	ENSMUST00000021802	1.02821e+07	8.86537e+06	1.02744e+07	9.67764e+06	9.77488e+06	1.92449e+07	1.75987e+07	1.83204e+07	1.8388e+07	1.88115	0.911616	4.40797
ENSMUST00000144673	2	2	91.54	5.78991e-05	64276	ENSMUST00000144673	472088	537004	550647	369807	482386	124445	106732	111950	114376	0.237104	-2.07641	4.23733
ENSMUST00000170774	15	15	927.89	9.44396e-05	69386	ENSMUST00000170774	6.4224e+06	6.83529e+06	6.36599e+06	6.58711e+06	6.5527e+06	1.54962e+07	1.2552e+07	1.24039e+07	1.3484e+07	2.05778	1.04109	4.02485
ENSMUST00000031810	3	3	185.56	0.0001085	41416	ENSMUST00000031810	450288	507777	563717	567573	522339	1.51872e+06	1.20506e+06	1.30296e+06	1.34225e+06	2.56969	1.36159	3.96457
ENSMUST00000031977	7	7	416.37	0.000138995	46946	ENSMUST00000031977	1.3427e+07	1.71369e+07	1.82234e+07	1.55084e+07	1.60739e+07	5.72892e+06	6.36544e+06	6.8049e+06	6.29975e+06	0.391924	-1.35136	3.857
ENSMUST00000090414	12	12	1033.52	0.000158852	54424	ENSMUST00000090414	1.4247e+07	1.41742e+07	1.1438e+07	1.17978e+07	1.29143e+07	2.86237e+07	2.64141e+07	2.61485e+07	2.70621e+07	2.09552	1.06731	3.79901
ENSMUST00000028167	13	13	665.66	0.00022134	80902	ENSMUST00000028167	7.15045e+06	8.163e+06	7.66056e+06	8.96171e+06	7.98393e+06	1.47004e+07	1.70832e+07	1.47639e+07	1.55158e+07	1.94338	0.95857	3.65494
ENSMUST00000120240	3	3	296.27	0.000295129	28636	ENSMUST00000120240	1.19305e+07	1.07991e+07	1.36682e+07	1.12726e+07	1.19176e+07	6.86344e+06	6.58821e+06	6.08683e+06	6.51283e+06	0.546487	-0.871741	3.52999
ENSMUST00000084214	33	33	1827.92	0.000600977	174610	ENSMUST00000084214	2.91304e+07	3.06279e+07	2.70335e+07	2.87308e+07	2.88806e+07	4.22086e+07	4.02422e+07	3.74036e+07	3.99515e+07	1.38333	0.468145	3.22114
ENSMUST00000094964	10	9	500.6	0.00106201	460608	ENSMUST00000094964	1.70991e+06	2.02379e+06	2.16304e+06	2.06427e+06	1.99025e+06	3.65838e+06	3.20925e+06	3.06353e+06	3.31039e+06	1.6633	0.734048	2.97387
ENSMUST00000028083	11	11	686.21	0.00132237	29872	ENSMUST00000028083	2.85423e+07	3.1948e+07	2.63815e+07	2.80268e+07	2.87246e+07	4.46052e+07	3.93983e+07	4.0384e+07	4.14625e+07	1.44345	0.529518	2.87865
ENSMUST00000060835	6	6	370.62	0.00136607	162440	ENSMUST00000060835	1.38945e+06	1.44774e+06	1.29556e+06	1.35533e+06	1.37202e+06	997950	889841	1.06608e+06	984622	0.717645	-0.478657	2.86453
ENSMUST00000089759	3	3	117.94	0.00169779	38274	ENSMUST00000089759	365110	517305	581523	431528	473867	190666	195367	127888	171307	0.361509	-1.4679	2.77012
ENSMUST00000165242	12	12	665.98	0.00173308	63498	ENSMUST00000165242	5.08874e+06	6.57418e+06	4.99362e+06	5.8906e+06	5.63678e+06	8.74664e+06	9.13624e+06	9.07372e+06	8.98554e+06	1.59409	0.672733	2.76118
ENSMUST00000007747	5	4	222.43	0.00187726	71105	ENSMUST00000007747	2.1012e+06	2.49988e+06	2.34582e+06	2.11429e+06	2.2653e+06	1.62447e+06	1.33131e+06	1.52185e+06	1.49254e+06	0.658872	-0.60193	2.72648
ENSMUST00000065425	18	18	1139.62	0.00194717	71428	ENSMUST00000065425	1.7543e+07	1.3124e+07	1.60292e+07	1.53085e+07	1.55012e+07	2.69257e+07	2.35236e+07	2.39952e+07	2.48148e+07	1.60084	0.678826	2.7106
ENSMUST00000074156	16	16	1002.69	0.0021266	55038	ENSMUST00000074156	3.09887e+06	4.93545e+06	3.36705e+06	5.6761e+06	4.26937e+06	1.29024e+07	1.06081e+07	1.18258e+07	1.17788e+07	2.7589	1.46409	2.67231
ENSMUST00000042517	5	5	357.2	0.00232745	73195	ENSMUST00000042517	2.65075e+06	2.02664e+06	2.70746e+06	1.80116e+06	2.2965e+06	621274	781460	1.0876e+06	830111	0.361467	-1.46806	2.63312
ENSMUST00000020112	5	5	266.67	0.00267573	161838	ENSMUST00000020112	274470	386904	243792	527952	358280	1.30564e+06	1.03854e+06	1.05237e+06	1.13219e+06	3.16006	1.65995	2.57256
ENSMUST00000023759	4	4	258.4	0.00268312	58208	ENSMUST00000023759	3.59132e+06	1.65023e+06	2.22276e+06	2.10727e+06	2.3929e+06	860706	744391	678159	761085	0.31806	-1.65263	2.57136
ENSMUST00000102715	15	15	956.75	0.00287385	60282	ENSMUST00000102715	8.0904e+06	1.10201e+07	8.2675e+06	1.0442e+07	9.455e+06	2.05614e+07	1.72117e+07	1.54855e+07	1.77529e+07	1.87761	0.908901	2.54154
ENSMUST00000021347	9	9	638.88	0.0031033	88285	ENSMUST00000021347	1.06768e+07	1.26962e+07	1.13261e+07	1.60741e+07	1.26933e+07	7.26659e+06	7.04542e+06	6.274e+06	6.862e+06	0.540601	-0.887364	2.50818
ENSMUST00000023214	3	3	127.88	0.00322645	56753	ENSMUST00000023214	2.88019e+06	2.01356e+06	901738	1.27886e+06	1.76859e+06	384503	204999	187558	259020	0.146456	-2.77146	2.49128
ENSMUST00000035540	4	4	146.46	0.00332717	120739	ENSMUST00000035540	1.52043e+06	921091	1.65683e+06	1.02391e+06	1.28057e+06	552601	391019	436716	460112	0.359303	-1.47673	2.47793
ENSMUST00000042780	5	5	251.14	0.00394015	125147	ENSMUST00000042780	701936	516245	679391	434776	583087	1.04953e+06	1.47459e+06	1.41474e+06	1.31295e+06	2.25173	1.17103	2.40449
ENSMUST00000023882	22	22	1226.69	0.00407309	142530	ENSMUST00000023882	2.2144e+07	1.82332e+07	2.14926e+07	1.9121e+07	2.02477e+07	1.40548e+07	1.58455e+07	1.40299e+07	1.46434e+07	0.723212	-0.467509	2.39008
ENSMUST00000056758	4	4	153.92	0.00436848	58606	ENSMUST00000056758	1.21959e+06	1.05244e+06	1.05241e+06	1.58882e+06	1.22831e+06	2.73428e+06	2.21728e+06	2.09775e+06	2.34977e+06	1.913	0.93584	2.35967
ENSMUST00000025835	2	2	109.08	0.0046309	88195	ENSMUST00000025835	722372	517426	665784	368759	568585	124398	143946	246020	171455	0.301546	-1.72955	2.33433
ENSMUST00000036030	4	4	336.05	0.00533874	21262	ENSMUST00000036030	1.07519e+07	1.25474e+07	8.70524e+06	1.29299e+07	1.12336e+07	6.74732e+06	6.43242e+06	6.84672e+06	6.67548e+06	0.594242	-0.750878	2.27256
ENSMUST00000022386	6	6	275.24	0.00541655	78310	ENSMUST00000022386	2.93627e+06	2.11594e+06	2.30439e+06	2.03392e+06	2.34763e+06	3.57639e+06	4.72569e+06	3.94536e+06	4.08248e+06	1.73898	0.798241	2.26628
ENSMUST00000111564	8	3	421.66	0.00563117	147152	ENSMUST00000111564	1.76154e+06	1.80511e+06	1.51798e+06	2.32718e+06	1.85295e+06	3.23724e+06	3.19369e+06	2.80653e+06	3.07916e+06	1.66176	0.73271	2.2494
ENSMUST00000048028	3	3	145.29	0.00575071	141077	ENSMUST00000048028	1.41803e+06	2.17449e+06	1.93075e+06	1.83797e+06	1.84031e+06	881719	1.07753e+06	1.13157e+06	1.03027e+06	0.559836	-0.836923	2.24028
ENSMUST00000026387	7	7	321.23	0.00613676	28762	ENSMUST00000026387	5.97321e+06	4.93327e+06	4.70094e+06	4.68583e+06	5.07331e+06	8.75829e+06	6.76709e+06	7.62434e+06	7.71657e+06	1.52101	0.605031	2.21206
ENSMUST00000079009	6	6	244.48	0.00679319	155882	ENSMUST00000079009	2.52256e+06	2.36632e+06	4.24919e+06	3.06533e+06	3.05085e+06	1.60924e+06	1.28788e+06	1.41066e+06	1.43592e+06	0.470663	-1.08723	2.16793
ENSMUST00000022808	11	11	688.34	0.00682348	32277	ENSMUST00000022808	8.35215e+07	6.79551e+07	1.06734e+08	6.90831e+07	8.18234e+07	4.53607e+07	4.7644e+07	4.55458e+07	4.61835e+07	0.564429	-0.825136	2.16599
ENSMUST00000161286	11	11	835.36	0.00730175	33646	ENSMUST00000161286	9.68022e+07	6.22278e+07	9.10207e+07	6.77043e+07	7.94387e+07	4.1717e+07	4.73684e+07	4.24173e+07	4.38342e+07	0.551799	-0.857784	2.13657
ENSMUST00000026094	4	4	226.59	0.0075374	22805	ENSMUST00000026094	6.08219e+07	3.54793e+07	5.46056e+07	3.93912e+07	4.75745e+07	2.61547e+07	2.15039e+07	2.21572e+07	2.32719e+07	0.489168	-1.0316	2.12278
ENSMUST00000004389	5	5	322.41	0.00756493	13186	ENSMUST00000004389	1.30528e+06	1.88296e+06	1.87697e+06	2.20344e+06	1.81717e+06	3.76299e+06	2.87401e+06	3.64834e+06	3.42845e+06	1.8867	0.915866	2.1212
ENSMUST00000117564	13	12	704.71	0.00761112	584262	ENSMUST00000117564	422695	1.1821e+06	436052	1.25975e+06	825149	3.22992e+06	3.85847e+06	3.23796e+06	3.44211e+06	4.17151	2.06057	2.11855
ENSMUST00000220509	3	3	218.77	0.00773194	32824	ENSMUST00000220509	829739	1.21528e+06	634911	854804	883684	2.48e+06	1.67183e+06	1.75224e+06	1.96803e+06	2.22707	1.15515	2.11171
ENSMUST00000008477	9	9	440.59	0.00799139	25307	ENSMUST00000008477	3.14456e+07	1.6552e+07	2.43931e+07	2.0312e+07	2.31757e+07	1.18809e+07	1.10809e+07	1.0781e+07	1.12476e+07	0.48532	-1.04299	2.09738
ENSMUST00000173173	4	4	178.29	0.00903335	101290	ENSMUST00000173173	1.13873e+06	1.36349e+06	1.06573e+06	1.24426e+06	1.20305e+06	795879	898614	939231	877908	0.729732	-0.454561	2.04415
ENSMUST00000030541	4	4	135.95	0.00915403	60829	ENSMUST00000030541	2.67665e+06	2.04663e+06	2.07656e+06	1.83774e+06	2.1594e+06	991384	1.32547e+06	1.43454e+06	1.25047e+06	0.579081	-0.788162	2.03839
ENSMUST00000096766	4	4	209	0.00923088	109903	ENSMUST00000096766	5.26185e+07	4.9627e+07	1.97482e+07	3.2082e+07	3.85189e+07	9.78703e+07	1.18115e+08	1.17448e+08	1.11144e+08	2.88544	1.52879	2.03476
ENSMUST00000090042	2	2	79.79	0.00941554	63768	ENSMUST00000090042	767100	305604	657045	659242	597248	248632	146147	143363	179381	0.300345	-1.73531	2.02615
ENSMUST00000113489	13	13	797.23	0.00943128	61717	ENSMUST00000113489	4.0351e+07	3.34365e+07	3.86025e+07	3.17796e+07	3.60424e+07	2.81968e+07	2.60141e+07	2.36132e+07	2.59414e+07	0.719746	-0.47444	2.02543
ENSMUST00000093100	31	31	2033.27	0.00989985	69660	ENSMUST00000093100	6.17749e+07	6.17968e+07	6.79535e+07	6.9889e+07	6.53535e+07	9.41897e+07	8.5312e+07	7.58148e+07	8.51055e+07	1.30223	0.380988	2.00437
ENSMUST00000099537	8	8	374.8	0.00997611	172443	ENSMUST00000099537	3.56818e+06	3.67181e+06	3.73142e+06	4.34187e+06	3.82832e+06	3.11066e+06	2.57581e+06	2.96368e+06	2.88338e+06	0.753172	-0.408949	2.00104
ENSMUST00000021372	3	3	155.22	0.00998318	23260	ENSMUST00000021372	1.44557e+06	2.3917e+06	1.69119e+06	2.20634e+06	1.9337e+06	869732	1.2065e+06	900654	992295	0.513159	-0.962521	2.00073
ENSMUST00000033139	5	5	235	0.0102889	59108	ENSMUST00000033139	1.21529e+06	1.58987e+06	1.7666e+06	1.23552e+06	1.45182e+06	3.90503e+06	2.30565e+06	2.6041e+06	2.93826e+06	2.02385	1.0171	1.98763
ENSMUST00000079847	3	3	176.64	0.0103526	41324	ENSMUST00000079847	2.05491e+06	1.29852e+06	3.38515e+06	1.08916e+06	1.95693e+06	381907	281839	653820	439189	0.224427	-2.15568	1.98495
ENSMUST00000015239	9	9	581.81	0.0119141	64605	ENSMUST00000015239	2.574e+06	2.95575e+06	3.99744e+06	3.98517e+06	3.37809e+06	7.55991e+06	5.3763e+06	5.61572e+06	6.18398e+06	1.83061	0.872327	1.92394
ENSMUST00000102718	31	31	2325.93	0.0122456	150698	ENSMUST00000102718	2.41089e+07	2.56421e+07	2.32114e+07	2.23711e+07	2.38334e+07	3.41016e+07	2.77393e+07	2.9188e+07	3.0343e+07	1.27313	0.348381	1.91202
ENSMUST00000078019	3	3	106.72	0.0126376	58686	ENSMUST00000078019	253235	432797	175849	202492	266093	552435	1.36648e+06	2.13515e+06	1.35136e+06	5.07851	2.3444	1.89833
ENSMUST00000072857	3	3	135.85	0.0130955	74703	ENSMUST00000072857	3.37624e+06	5.22525e+06	3.25485e+06	5.54152e+06	4.34947e+06	2.58918e+06	1.57167e+06	1.73281e+06	1.96455e+06	0.451677	-1.14664	1.88288
ENSMUST00000028517	7	7	635.08	0.013262	44701	ENSMUST00000028517	1.06817e+07	1.05014e+07	1.07097e+07	1.15574e+07	1.08625e+07	1.43777e+07	1.19586e+07	1.32448e+07	1.31937e+07	1.2146	0.280486	1.87739
ENSMUST00000037850	6	6	299.03	0.0137858	58435	ENSMUST00000037850	734562	834697	1.11911e+06	1.11191e+06	950069	1.35225e+06	1.98698e+06	2.28385e+06	1.87436e+06	1.97287	0.980294	1.86057
ENSMUST00000020705	3	3	111.45	0.0137865	67753	ENSMUST00000020705	631733	540948	1.1379e+06	1.24035e+06	887731	256859	199539	401174	285857	0.322009	-1.63483	1.86055
ENSMUST00000035177	3	3	94.75	0.0141252	39085	ENSMUST00000035177	693702	403265	668388	297160	515629	211517	186904	192604	197008	0.382074	-1.38808	1.85001
ENSMUST00000113054	2	2	72.73	0.0144241	195308	ENSMUST00000113054	12616.8	28992	97650.1	56653.3	48978.1	333215	231932	241040	268729	5.48672	2.45594	1.84091
ENSMUST00000028052	3	3	128.54	0.0160208	42727	ENSMUST00000028052	793292	528649	758412	530780	652783	1.11564e+06	1.12329e+06	938515	1.05915e+06	1.62251	0.698231	1.79532
ENSMUST00000167406	5	5	455.76	0.0174081	16724	ENSMUST00000167406	1.93062e+07	2.70043e+07	2.25395e+07	2.57533e+07	2.36508e+07	4.14559e+07	3.22322e+07	3.1957e+07	3.52151e+07	1.48896	0.574303	1.75925
ENSMUST00000018337	3	3	205.69	0.0175261	60539	ENSMUST00000018337	2.3789e+06	3.22529e+06	2.77552e+06	2.20158e+06	2.64532e+06	1.88044e+06	1.71356e+06	1.26708e+06	1.62036e+06	0.612538	-0.707129	1.75632
ENSMUST00000042373	36	36	2702.74	0.0176159	70903	ENSMUST00000042373	1.21572e+08	9.72598e+07	1.05229e+08	1.09639e+08	1.08425e+08	1.88623e+08	1.37136e+08	1.40925e+08	1.55561e+08	1.43473	0.520783	1.75409
ENSMUST00000082262	5	5	225.32	0.0177692	111492	ENSMUST00000082262	1.95041e+06	3.56194e+06	3.77859e+06	3.79256e+06	3.27087e+06	1.67474e+06	1.55772e+06	1.63734e+06	1.62326e+06	0.496278	-1.01078	1.75033
ENSMUST00000071972	6	6	306.22	0.0184296	144843	ENSMUST00000071972	1.35412e+06	1.15146e+06	1.26398e+06	1.26341e+06	1.25824e+06	2.00407e+06	1.43157e+06	2.0745e+06	1.83672e+06	1.45975	0.545718	1.73448
ENSMUST00000027947	6	6	390.75	0.0184687	59773	ENSMUST00000027947	3.63695e+06	2.8162e+06	3.32865e+06	3.30192e+06	3.27093e+06	2.78493e+06	2.15284e+06	2.19736e+06	2.37838e+06	0.727126	-0.459722	1.73356
ENSMUST00000015509	5	5	182.67	0.0185202	132703	ENSMUST00000015509	2.26763e+06	2.12545e+06	2.19487e+06	1.08775e+06	1.91893e+06	821402	700185	1.03086e+06	850816	0.443381	-1.17338	1.73235
ENSMUST00000000828	27	27	2016.08	0.0190437	67510	ENSMUST00000000828	8.2057e+07	1.18745e+08	8.53313e+07	1.09224e+08	9.88394e+07	1.71312e+08	1.437e+08	1.3402e+08	1.49677e+08	1.51435	0.598697	1.72025
ENSMUST00000165884	2	2	228.74	0.0204966	17438	ENSMUST00000165884	4.39076e+06	8.28721e+06	8.52893e+06	8.29553e+06	7.37561e+06	4.42581e+06	3.08858e+06	2.66328e+06	3.39256e+06	0.45997	-1.12039	1.68832
ENSMUST00000059279	11	11	575.9	0.021004	405444	ENSMUST00000059279	1.10691e+06	2.73784e+06	1.39544e+06	2.65766e+06	1.97446e+06	4.35935e+06	4.6689e+06	4.49057e+06	4.50627e+06	2.28228	1.19048	1.6777
ENSMUST00000154207	26	26	2020.79	0.0217786	27568	ENSMUST00000154207	4.42563e+08	4.1961e+08	3.4547e+08	4.58247e+08	4.16472e+08	5.87848e+08	5.1786e+08	5.23374e+08	5.43027e+08	1.30387	0.382804	1.66197
ENSMUST00000170651	43	41	2139.21	0.0230093	540892	ENSMUST00000170651	1.76193e+07	2.16019e+07	1.78529e+07	1.7609e+07	1.86708e+07	2.35325e+07	2.3882e+07	2.15332e+07	2.29826e+07	1.23094	0.299757	1.6381
ENSMUST00000025649	32	32	2092.42	0.0232917	126772	ENSMUST00000025649	6.51222e+07	5.72403e+07	7.80124e+07	6.76168e+07	6.69979e+07	5.54445e+07	4.6405e+07	4.94039e+07	5.04178e+07	0.752528	-0.410183	1.6328
ENSMUST00000189341	4	4	216.23	0.0261882	74233	ENSMUST00000189341	935237	981537	863936	766872	886896	1.33869e+06	1.10942e+06	1.05604e+06	1.16805e+06	1.31701	0.397267	1.58189
ENSMUST00000163739	2	2	70.15	0.0266309	46886	ENSMUST00000163739	241938	360598	245156	365398	303272	604192	421123	471828	499048	1.64554	0.718564	1.57461
ENSMUST00000047086	2	2	106.53	0.0295329	75334	ENSMUST00000047086	1.95113e+06	1.46755e+06	2.32306e+06	1.20423e+06	1.73649e+06	1.05127e+06	876729	1.01995e+06	982648	0.565881	-0.82143	1.52969
ENSMUST00000070330	12	12	593.69	0.0302288	96743	ENSMUST00000070330	9.47363e+06	1.02357e+07	1.09786e+07	1.05103e+07	1.02995e+07	1.34215e+07	1.11366e+07	1.22693e+07	1.22758e+07	1.19188	0.253237	1.51958
ENSMUST00000025253	14	14	794.11	0.0309679	229063	ENSMUST00000025253	7.82534e+06	8.09893e+06	6.0523e+06	6.72234e+06	7.17473e+06	1.05805e+07	8.80157e+06	8.98366e+06	9.45525e+06	1.31785	0.398191	1.50909
ENSMUST00000029922	8	8	387.79	0.0310486	32884	ENSMUST00000029922	5.19012e+06	2.69432e+06	2.84351e+06	2.02433e+06	3.18807e+06	5.67338e+06	6.56077e+06	5.96554e+06	6.06656e+06	1.9029	0.928197	1.50796
ENSMUST00000072178	24	24	1728.57	0.0315709	77967	ENSMUST00000072178	1.7012e+07	2.6403e+07	1.55641e+07	2.17143e+07	2.01734e+07	3.11452e+07	2.95843e+07	2.95675e+07	3.0099e+07	1.49202	0.577265	1.50071
ENSMUST00000020173	6	6	301.98	0.0320262	81924	ENSMUST00000020173	2.71508e+06	2.67217e+06	1.21276e+06	2.48591e+06	2.27148e+06	4.10452e+06	5.62293e+06	3.92447e+06	4.55064e+06	2.00338	1.00244	1.4945
ENSMUST00000022954	6	5	339.17	0.0337057	38784	ENSMUST00000022954	1.98011e+07	1.72339e+07	2.04276e+07	1.20621e+07	1.73812e+07	1.19068e+07	1.0714e+07	1.09114e+07	1.11774e+07	0.643076	-0.636939	1.4723
ENSMUST00000020413	14	14	890.14	0.0339082	44824	ENSMUST00000020413	2.1052e+07	2.61134e+07	1.68866e+07	3.90268e+07	2.57697e+07	4.4756e+07	5.1867e+07	4.21046e+07	4.62425e+07	1.79445	0.843544	1.4697
ENSMUST00000161596	2	2	107.55	0.0341916	40836	ENSMUST00000161596	986428	2.07837e+06	1.98025e+06	2.67743e+06	1.93062e+06	791386	860675	948425	866829	0.44899	-1.15524	1.46608
ENSMUST00000033342	8	8	574.23	0.0346168	37960	ENSMUST00000033342	6.96992e+06	9.88061e+06	6.75864e+06	8.87638e+06	8.12139e+06	1.04302e+07	1.20827e+07	1.1061e+07	1.11913e+07	1.378	0.462578	1.46071
ENSMUST00000024717	7	7	316.2	0.036968	91779	ENSMUST00000024717	3.03059e+06	2.83136e+06	2.8009e+06	2.71789e+06	2.84519e+06	3.59899e+06	3.02951e+06	3.22309e+06	3.28386e+06	1.15418	0.206871	1.43217
ENSMUST00000032441	6	6	252.47	0.0371933	49976	ENSMUST00000032441	553626	1.15244e+06	399001	1.24457e+06	837410	1.87178e+06	2.23533e+06	1.72566e+06	1.94426e+06	2.32175	1.21521	1.42954
ENSMUST00000026009	14	14	1096.74	0.0437622	20474	ENSMUST00000026009	8.65485e+07	1.19009e+08	1.02729e+08	1.04254e+08	1.03135e+08	1.36835e+08	1.30729e+08	1.18909e+08	1.28825e+08	1.24908	0.32087	1.3589
ENSMUST00000035033	18	18	1020.11	0.0462655	102384	ENSMUST00000035033	1.80712e+07	2.08212e+07	1.89573e+07	2.27161e+07	2.01414e+07	2.38075e+07	2.26033e+07	2.521e+07	2.38736e+07	1.1853	0.245249	1.33474
ENSMUST00000033640	2	2	66.43	0.0495137	62358	ENSMUST00000033640	94562.9	114684	14356.6	144446	92012.5	272312	391457	423161	362310	3.93762	1.97732	1.30527
ENSMUST00000073418	45	42	2285.05	0.0546149	533861	ENSMUST00000073418	2.96949e+07	1.67959e+07	2.70348e+07	1.82522e+07	2.29445e+07	1.3327e+07	1.45865e+07	1.56884e+07	1.4534e+07	0.633441	-0.658717	1.26269
ENSMUST00000069107	2	2	81.03	0.0648124	41249	ENSMUST00000069107	1.01128e+06	872220	845026	1.35749e+06	1.0215e+06	795796	667363	731005	731388	0.715992	-0.481985	1.18834
ENSMUST00000029663	9	9	628.35	0.0678069	35144	ENSMUST00000029663	1.19077e+07	1.50049e+07	1.17731e+07	1.75966e+07	1.40706e+07	2.17471e+07	1.85831e+07	1.65936e+07	1.89746e+07	1.34853	0.431385	1.16873
ENSMUST00000106228	4	4	271.27	0.0717031	37139	ENSMUST00000106228	4.10423e+06	4.64905e+06	4.77705e+06	2.96306e+06	4.12335e+06	3.10719e+06	3.10605e+06	2.77184e+06	2.99502e+06	0.726357	-0.461249	1.14446
ENSMUST00000156187	9	9	411.26	0.0721403	175660	ENSMUST00000156187	2.22292e+06	2.84658e+06	2.31599e+06	3.69532e+06	2.7702e+06	5.61247e+06	3.22979e+06	4.0825e+06	4.30825e+06	1.55521	0.637111	1.14182
ENSMUST00000027040	10	10	507.58	0.0799779	182234	ENSMUST00000027040	1.6487e+06	2.50605e+06	1.89876e+06	2.27588e+06	2.08235e+06	3.18348e+06	2.64588e+06	2.41731e+06	2.74889e+06	1.32009	0.400638	1.09703
ENSMUST00000049484	2	2	95.27	0.0821623	42452	ENSMUST00000049484	71281.8	265742	96071.7	296529	182406	336924	402637	423756	387772	2.12587	1.08806	1.08533
ENSMUST00000002289	15	15	1445.19	0.0865126	26135	ENSMUST00000002289	6.32931e+07	8.51331e+07	6.34638e+07	9.32108e+07	7.62752e+07	1.09214e+08	9.04762e+07	9.66168e+07	9.87689e+07	1.2949	0.372842	1.06292
ENSMUST00000025215	15	15	1122.47	0.0922125	52397	ENSMUST00000025215	1.14316e+07	1.9852e+07	1.07463e+07	1.70524e+07	1.47706e+07	2.26907e+07	2.10016e+07	1.90718e+07	2.09214e+07	1.41642	0.502253	1.03521
ENSMUST00000026560	18	18	1220.84	0.0928715	42782	ENSMUST00000026560	3.29427e+07	3.01553e+07	2.75551e+07	3.06519e+07	3.03263e+07	3.3062e+07	3.2798e+07	3.35701e+07	3.31434e+07	1.09289	0.128154	1.03212
ENSMUST00000039608	3	3	158.6	0.093296	75800	ENSMUST00000039608	338783	417733	264328	406510	356838	550158	396050	502239	482816	1.35304	0.436202	1.03014
ENSMUST00000080036	3	3	113.91	0.0973336	344569	ENSMUST00000080036	88059.1	193880	187340	268499	184444	362516	260192	313693	312134	1.69229	0.758979	1.01174
ENSMUST00000042608	2	2	108.1	0.0993888	44685	ENSMUST00000042608	1.50813e+06	765489	788051	583547	911305	304458	393601	732737	476932	0.523351	-0.93415	1.00266
ENSMUST00000057288	26	26	2706.18	0.114826	48102	ENSMUST00000057288	4.17056e+08	6.95968e+08	4.42789e+08	6.8015e+08	5.58991e+08	4.00692e+08	4.14212e+08	3.81849e+08	3.98918e+08	0.71364	-0.486732	0.939959
ENSMUST00000101044	3	3	177.59	0.118622	136696	ENSMUST00000101044	1.58749e+06	2.18322e+06	2.10659e+06	2.23396e+06	2.02781e+06	1.42268e+06	1.45836e+06	1.93247e+06	1.60451e+06	0.791249	-0.337796	0.925833
ENSMUST00000004316	4	3	165.86	0.126364	61251	ENSMUST00000004316	1.90588e+07	1.12549e+07	1.87775e+07	1.53515e+07	1.61107e+07	1.10857e+07	1.2032e+07	1.29016e+07	1.20064e+07	0.745245	-0.424214	0.898376
ENSMUST00000238061	13	13	904.67	0.130768	29219	ENSMUST00000238061	1.66162e+07	2.17201e+07	1.54968e+07	2.16409e+07	1.88685e+07	1.78331e+07	1.32578e+07	1.34331e+07	1.48413e+07	0.786565	-0.346362	0.883499
ENSMUST00000061287	2	2	85.6	0.131786	112606	ENSMUST00000061287	119231	383151	144605	375696	255671	379825	431143	506004	438991	1.71702	0.779904	0.880131
ENSMUST00000047441	2	2	81.98	0.138293	873992	ENSMUST00000047441	6.10496e+06	3.11034e+06	4.93793e+06	2.22319e+06	4.0941e+06	1.81003e+06	2.85935e+06	2.27673e+06	2.31537e+06	0.565538	-0.822304	0.859199
ENSMUST00000060043	11	11	581.92	0.145301	250779	ENSMUST00000060043	4.77698e+06	4.88682e+06	3.93391e+06	4.21964e+06	4.45434e+06	5.82624e+06	4.91231e+06	4.67666e+06	5.13841e+06	1.15357	0.20611	0.837731
ENSMUST00000091579	17	17	1228.08	0.148702	41737	ENSMUST00000091579	7.83635e+07	5.8708e+07	6.31933e+07	6.73093e+07	6.68935e+07	9.7541e+07	7.20786e+07	7.33322e+07	8.09839e+07	1.21064	0.275769	0.827683
ENSMUST00000040856	2	2	84.23	0.150649	36036	ENSMUST00000040856	73605	112132	49655.7	1483.09	59219	126268	308540	244827	226545	3.82554	1.93566	0.822034
ENSMUST00000032057	13	13	650.51	0.154886	78489	ENSMUST00000032057	7.60068e+06	6.19503e+06	5.06799e+06	7.57243e+06	6.60903e+06	8.27225e+06	7.57585e+06	7.93088e+06	7.92633e+06	1.19932	0.262214	0.809987
ENSMUST00000001079	4	4	194.66	0.155528	135465	ENSMUST00000001079	444750	585309	705363	589639	581265	813628	653232	670140	712333	1.22549	0.293356	0.808192
ENSMUST00000035055	30	30	2009.52	0.158293	117357	ENSMUST00000035055	5.77113e+07	6.9457e+07	4.95927e+07	6.72076e+07	6.09921e+07	7.2097e+07	7.4268e+07	6.64305e+07	7.09318e+07	1.16297	0.21781	0.800538
ENSMUST00000027833	31	31	1823.08	0.161248	139321	ENSMUST00000027833	3.65108e+07	3.98616e+07	3.92833e+07	4.27609e+07	3.96041e+07	3.87484e+07	3.58516e+07	3.58052e+07	3.68017e+07	0.929239	-0.105879	0.792505
ENSMUST00000011895	2	2	97.19	0.168285	288646	ENSMUST00000011895	407292	109313	235688	67215.2	204877	382603	266396	455681	368226	1.7973	0.845835	0.773954
ENSMUST00000041463	2	2	74.56	0.176369	27708	ENSMUST00000041463	125849	303355	202741	307143	234772	363624	249890	474918	362811	1.54538	0.627958	0.753578
ENSMUST00000098609	3	3	162.45	0.181449	73012	ENSMUST00000098609	1.55954e+06	2.814e+06	2.18381e+06	2.29804e+06	2.21385e+06	3.30699e+06	2.45624e+06	2.66987e+06	2.81103e+06	1.26975	0.344544	0.741247
ENSMUST00000085385	2	2	108.05	0.181943	229244	ENSMUST00000085385	306908	762701	428341	623292	530310	389439	316266	324863	343523	0.647777	-0.626431	0.740065
ENSMUST00000102815	8	8	371.6	0.193068	123974	ENSMUST00000102815	8.73112e+06	7.64334e+06	5.5569e+06	7.35234e+06	7.32093e+06	4.33975e+06	6.15003e+06	6.84417e+06	5.77798e+06	0.789242	-0.34146	0.714289
ENSMUST00000023694	8	8	556.07	0.194867	33169	ENSMUST00000023694	1.07623e+07	1.01901e+07	1.09831e+07	6.82483e+06	9.69008e+06	1.44347e+07	1.02207e+07	1.18324e+07	1.21626e+07	1.25516	0.32787	0.710261
ENSMUST00000031617	19	18	1178.63	0.19638	33489	ENSMUST00000031617	8.6765e+07	6.05722e+07	7.56279e+07	7.03086e+07	7.33184e+07	6.79265e+07	6.00708e+07	6.19251e+07	6.33074e+07	0.863459	-0.211801	0.706902
ENSMUST00000044217	4	4	183.37	0.198978	782238	ENSMUST00000044217	290364	236222	175586	229979	233038	439693	206523	361733	335983	1.44175	0.527825	0.701196
ENSMUST00000097822	48	48	2958.63	0.226444	571927	ENSMUST00000097822	1.23346e+07	1.98872e+07	1.27915e+07	1.94055e+07	1.61047e+07	2.14238e+07	1.88764e+07	1.84284e+07	1.95762e+07	1.21556	0.281619	0.64504
ENSMUST00000027252	14	14	916.97	0.249495	137532	ENSMUST00000027252	8.87834e+06	1.19145e+07	8.41966e+06	1.08999e+07	1.00281e+07	8.90595e+06	9.08472e+06	8.12135e+06	8.70401e+06	0.867961	-0.204298	0.602939
ENSMUST00000103201	2	2	115.36	0.25779	265088	ENSMUST00000103201	1.28804e+06	203866	551936	318961	590701	245738	204541	314389	254889	0.431503	-1.21256	0.588733
ENSMUST00000034342	2	2	92.82	0.261197	17242	ENSMUST00000034342	1.96675e+06	1.18504e+06	1.31419e+06	1.19736e+06	1.41583e+06	969546	1.34894e+06	1.09169e+06	1.13673e+06	0.802867	-0.316767	0.583032
ENSMUST00000085375	2	2	88.53	0.274916	32188	ENSMUST00000085375	1.14766e+06	1.36206e+06	1.69904e+06	1.42691e+06	1.40891e+06	1.27949e+06	1.26427e+06	1.16992e+06	1.23789e+06	0.878615	-0.186698	0.5608
ENSMUST00000026991	12	12	1009.97	0.287728	50199	ENSMUST00000026991	1.6332e+07	2.56386e+07	1.91444e+07	2.55809e+07	2.1674e+07	1.87813e+07	1.96247e+07	1.56021e+07	1.80027e+07	0.830612	-0.267753	0.541017
ENSMUST00000026292	10	10	575.81	0.295927	482389	ENSMUST00000026292	1.17798e+06	2.72685e+06	1.51637e+06	2.67292e+06	2.02353e+06	2.45836e+06	2.44396e+06	2.7338e+06	2.54537e+06	1.25789	0.331004	0.528816
ENSMUST00000001148	15	14	1566.79	0.296165	39269	ENSMUST00000001148	1.25457e+08	8.36923e+07	1.035e+08	8.96174e+07	1.00567e+08	1.47239e+08	1.01369e+08	1.08346e+08	1.18985e+08	1.18314	0.242627	0.528467
ENSMUST00000149349	6	6	331.48	0.302123	117208	ENSMUST00000149349	1.05492e+06	3.52071e+06	1.51644e+06	2.59512e+06	2.1718e+06	3.2375e+06	3.13653e+06	2.30924e+06	2.89442e+06	1.33273	0.414386	0.519817
ENSMUST00000072186	11	11	475.73	0.314266	73658	ENSMUST00000072186	4.80492e+07	2.19372e+07	3.78114e+07	2.23508e+07	3.25371e+07	2.61959e+07	2.11395e+07	2.36555e+07	2.36636e+07	0.727281	-0.459415	0.502703
ENSMUST00000045376	8	8	588.25	0.330943	40123	ENSMUST00000045376	5.7499e+06	4.77015e+06	4.3739e+06	5.79201e+06	5.17149e+06	6.88737e+06	5.24528e+06	5.3514e+06	5.82802e+06	1.12695	0.172425	0.480247
ENSMUST00000026168	4	4	235.69	0.331036	108154	ENSMUST00000026168	344452	520834	518939	488261	468121	437564	352944	419993	403500	0.861957	-0.214313	0.480125
ENSMUST00000038584	2	2	72.72	0.3712	86570	ENSMUST00000038584	321081	136281	182876	110558	187699	2.32999e+06	274474	94039.5	899500	4.79225	2.2607	0.430392
ENSMUST00000038474	2	2	78.47	0.401405	32611	ENSMUST00000038474	420721	328978	570641	243565	390976	323211	314809	279286	305769	0.782065	-0.35464	0.396417
ENSMUST00000132121	2	2	130.99	0.411896	19588	ENSMUST00000132121	561707	946998	417993	150751	519362	678979	655360	602702	645680	1.24322	0.314079	0.385213
ENSMUST00000099858	14	14	874.62	0.438737	80700	ENSMUST00000099858	6.10154e+06	1.25603e+07	7.4173e+06	1.15915e+07	9.41765e+06	8.01092e+06	7.06705e+06	7.63945e+06	7.57247e+06	0.804072	-0.314603	0.357795
ENSMUST00000144326	8	8	607.18	0.45914	75720	ENSMUST00000144326	2.6725e+06	4.28637e+06	3.42171e+06	4.16573e+06	3.63658e+06	4.41046e+06	3.6727e+06	3.91739e+06	4.00019e+06	1.09999	0.137485	0.338055
ENSMUST00000063071	7	7	393.33	0.471794	107123	ENSMUST00000063071	5.73411e+06	2.76533e+06	4.3065e+06	3.00358e+06	3.95238e+06	5.21754e+06	4.25583e+06	3.99068e+06	4.48802e+06	1.13552	0.183357	0.326248
ENSMUST00000160285	4	4	181.54	0.472628	105451	ENSMUST00000160285	1.10605e+06	614479	1.20338e+06	856550	945114	1.21687e+06	898566	1.09953e+06	1.07165e+06	1.13389	0.181279	0.32548
ENSMUST00000102727	6	6	328.46	0.484959	75241	ENSMUST00000102727	1.60825e+07	8.2899e+06	1.02884e+07	3.08111e+06	9.43548e+06	6.01348e+06	6.26207e+06	5.45247e+06	5.90934e+06	0.626289	-0.6751	0.314295
ENSMUST00000005705	43	43	3541.02	0.539088	88791	ENSMUST00000005705	2.78846e+08	2.82035e+08	2.71681e+08	3.01791e+08	2.83589e+08	3.42648e+08	2.80074e+08	2.70693e+08	2.97805e+08	1.05013	0.0705704	0.26834
ENSMUST00000035010	11	11	705.02	0.57912	93255	ENSMUST00000035010	1.23953e+07	1.71091e+07	1.11981e+07	1.52573e+07	1.39899e+07	1.5253e+07	1.52967e+07	1.38639e+07	1.48045e+07	1.05823	0.0816493	0.237231
ENSMUST00000119756	4	4	188.81	0.580871	117226	ENSMUST00000119756	810512	962657	883633	919313	894029	687811	857653	1.00569e+06	850385	0.951183	-0.0722046	0.23592
ENSMUST00000040876	7	7	438.83	0.587029	82486	ENSMUST00000040876	5.67593e+06	6.26144e+06	8.20835e+06	7.06479e+06	6.80263e+06	7.49458e+06	7.26386e+06	6.6701e+06	7.14285e+06	1.05001	0.0704068	0.231341
ENSMUST00000217176	25	25	1283.18	0.651935	118131	ENSMUST00000217176	6.09404e+07	3.60234e+07	5.04407e+07	4.11863e+07	4.71477e+07	5.09462e+07	3.88936e+07	3.9898e+07	4.32459e+07	0.917244	-0.124622	0.185796
ENSMUST00000088169	3	3	354.46	0.664138	25412	ENSMUST00000088169	6.73403e+06	7.39918e+06	7.15527e+06	9.79317e+06	7.77041e+06	7.54127e+06	9.21545e+06	7.63355e+06	8.13009e+06	1.04629	0.06528	0.177741
ENSMUST00000042471	4	4	158.79	0.685537	108769	ENSMUST00000042471	446037	945337	309347	599955	575169	915581	360420	716777	664259	1.15489	0.207761	0.163969
ENSMUST00000115027	7	7	389.62	0.693877	89220	ENSMUST00000115027	4.62561e+06	1.80321e+06	4.20477e+06	1.79344e+06	3.10676e+06	2.83087e+06	2.85413e+06	4.15131e+06	3.27877e+06	1.05537	0.0777452	0.158718
ENSMUST00000101347	2	2	108.57	0.705974	36187	ENSMUST00000101347	472573	504450	439737	625232	510498	612712	401666	631236	548538	1.07452	0.103687	0.151211
ENSMUST00000084828	2	2	82.19	0.735548	130809	ENSMUST00000084828	1.29974e+07	7.69185e+06	7.55932e+06	6.51644e+06	8.69124e+06	1.1391e+07	7.53005e+06	8.54667e+06	9.15591e+06	1.05346	0.0751411	0.133389
ENSMUST00000025377	2	2	172.15	0.736613	51984	ENSMUST00000025377	1.69839e+06	3.11075e+06	2.64567e+06	2.67134e+06	2.53154e+06	2.41376e+06	2.2326e+06	2.37404e+06	2.34013e+06	0.924391	-0.113424	0.13276
ENSMUST00000020954	3	3	111.57	0.73965	87639	ENSMUST00000020954	1.48044e+06	2.00204e+06	1.49869e+06	1.87893e+06	1.71502e+06	1.66314e+06	1.61126e+06	1.66316e+06	1.64586e+06	0.95967	-0.0593902	0.130974
ENSMUST00000025846	12	11	718.84	0.748808	94593	ENSMUST00000025846	4.78581e+06	5.07126e+06	5.08863e+06	5.46578e+06	5.10287e+06	5.39724e+06	4.94127e+06	5.16418e+06	5.16757e+06	1.01268	0.0181761	0.125629
ENSMUST00000114077	5	5	300.04	0.798843	41574	ENSMUST00000114077	3.48745e+07	5.74211e+07	3.88555e+07	4.74035e+07	4.46386e+07	4.07757e+07	4.0393e+07	4.5837e+07	4.23353e+07	0.9484	-0.0764328	0.0975384
ENSMUST00000121964	5	5	244.02	0.824395	148515	ENSMUST00000121964	2.77432e+06	1.96059e+06	1.5811e+06	1.78722e+06	2.02581e+06	2.09141e+06	1.856e+06	1.80281e+06	1.91674e+06	0.946162	-0.0798407	0.0838648
ENSMUST00000041639	2	2	64.25	0.884027	165141	ENSMUST00000041639	1.61344e+07	7.62814e+06	6.77179e+06	5.41033e+06	8.98615e+06	8.72834e+06	8.26381e+06	8.6808e+06	8.55765e+06	0.952315	-0.0704893	0.0535343
ENSMUST00000048417	87	87	5013.61	0.903975	492029	ENSMUST00000048417	5.42247e+07	4.94388e+07	5.84332e+07	4.94727e+07	5.28923e+07	5.85186e+07	4.76877e+07	5.1265e+07	5.24904e+07	0.992401	-0.0110045	0.0438438
ENSMUST00000046627	2	2	70.24	0.906711	65759	ENSMUST00000046627	174157	570264	308478	397554	362613	371417	370550	297802	346589	0.955811	-0.0652031	0.042531
ENSMUST00000164539	15	15	718.29	0.912449	262937	ENSMUST00000164539	9.69811e+06	1.08477e+07	5.95063e+06	1.14629e+07	9.48983e+06	9.62621e+06	8.54277e+06	8.90944e+06	9.02614e+06	0.951138	-0.0722728	0.0397916
ENSMUST00000022348	4	4	212.35	0.963624	123019	ENSMUST00000022348	1.098e+06	1.92353e+06	1.49668e+06	1.72542e+06	1.56091e+06	1.61051e+06	1.38977e+06	1.56083e+06	1.52037e+06	0.974027	-0.0379659	0.0160925
